# Supplementary material
Source: Elsevier journal article supplement (https://www.sciencedirect.com/science/article/pii/S0325754115001613)
Supplement: mmc1 [file S0325754115001613:mmc1.pdf]

# Manual para el uso del sistema *CFC database* (*Cystic Fibrosis Cloud database*)

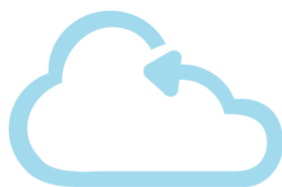

**CFC Database**  

---

CYSTIC FIBROSIS CLOUD

**2015**

# Manual para el uso de *CFC database*

## Contenido

|                                                             |    |
|-------------------------------------------------------------|----|
| Introducción .....                                          | 3  |
| Acceso a la <i>CFC database</i> .....                       | 4  |
| Pantalla de ingreso a la <i>CFC database</i> .....          | 4  |
| 1. Pacientes .....                                          | 6  |
| 1.1. Ingresar un paciente nuevo.....                        | 6  |
| 1.2. Buscar y modificar paciente ya ingresado .....         | 8  |
| 1.3. Eliminar paciente.....                                 | 10 |
| 2. Muestras.....                                            | 12 |
| 2.1. Ingresar una muestra nueva .....                       | 12 |
| 2.2. Ingresar destinos en muestras ya cargadas .....        | 14 |
| 3. Muestras destino.....                                    | 16 |
| 3.1. Ingresar análisis en muestras destino .....            | 16 |
| 4. Análisis.....                                            | 19 |
| 4.1. Consultar análisis en muestras destino.....            | 19 |
| 5. Estadísticas .....                                       | 22 |
| 5.1. Obtener estadísticas por resultados del ensayo .....   | 22 |
| 5.2. Obtener estadísticas por pacientes.....                | 24 |
| 6. Tablas .....                                             | 26 |
| 6.1. Agregar o modificar tipo de muestra .....              | 27 |
| 6.2. Agregar o modificar antibióticos.....                  | 28 |
| 6.3. Agregar o modificar tipo de ensayo .....               | 29 |
| 6.4. Agregar o modificar Ensayo .....                       | 30 |
| 6.4.1. Agregar o modificar subensayo.....                   | 32 |
| 6.5. Agregar o modificar diagnósticos.....                  | 33 |
| 6.6. Agregar o modificar tipo de infección.....             | 34 |
| 6.7. Agregar o modificar parámetros clínicos .....          | 35 |
| 6.8. Agregar o modificar Hospitales .....                   | 36 |
| 6.9. Agregar o modificar posibles resultados.....           | 37 |
| 6.9.1. Agregar o modificar valores para los resultados..... | 38 |
| 6.10. Agregar o modificar tipo de resultado .....           | 39 |

6.11. Agregar ciudades..... 40

Introducción

La base de datos “Cystic Fibrosis Cloud” (*CFC database*) es un instrumento informático desarrollado para el ordenamiento y utilización sistemática de los resultados de los análisis adquiridos en centros de salud y laboratorios especializados en la atención del paciente fibroquístico. El mismo consiste en una base de datos principal, de actualización permanente, que almacena información clínica del paciente y características fenotípicas y moleculares de los organismos patógenos responsables de las infecciones pulmonares de los mismos y una interface con plataforma en la web capaz de interconectar diferentes usuarios.

Para acceder a la *CFC database* sólo hace falta contar con una PC estándar, conexión a Internet y ser un usuario autorizado con una clave de ingreso. Los datos son ingresados y recopilados en un servidor central.

El sistema de información desarrollado está implementado en la nube en un servidor con Sistema Operativo Linux el cual cuenta con una base de datos PostgreSQL y una plataforma Servoy, la cual nos permite que sea accesible vía Web. Para mantener la interacción de los usuarios con la base de datos, se utiliza un lenguaje llamado SQL (*Structured Query Language*)

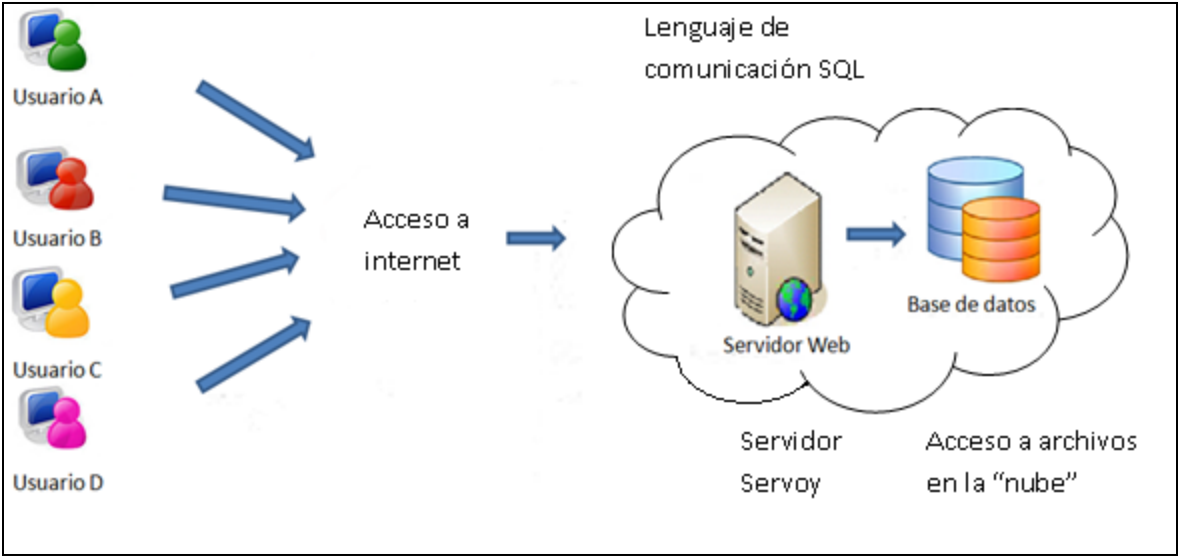

## Manual para el uso de *CFC database*

### Acceso a la *CFC database*

Para acceder a la CFC database hace falta contar con una PC estándar, conexión a Internet y ser un usuario autorizado con una clave de ingreso.

Ubicado en el navegador de Internet, el usuario escribe en la ventana que dice Dirección **[http://servoy.infocomsa.com/CFC\\_database](http://servoy.infocomsa.com/CFC_database)** y presiona la tecla Enter.

Aparece la pantalla inicial de la *CFC database*:



En el primer espacio se debe escribir el nombre del usuario y en el siguiente la contraseña o Clave de acceso otorgada.

Luego clicar en **Entrar**.

### Pantalla de ingreso a la *CFC database*

Encontrará la siguiente pantalla:

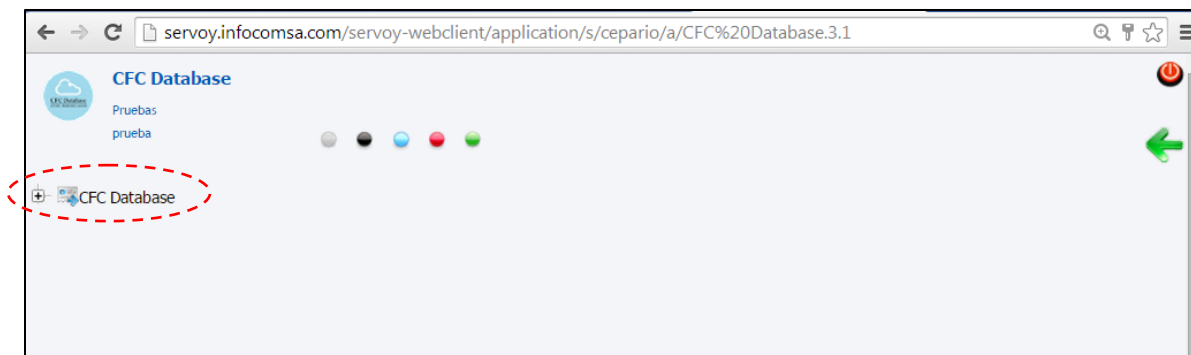

Clickee sobre el signo + a la izquierda de *CFC Database* para desplegar las opciones disponibles:

## Manual para el uso de *CFC database*

Verá en la pantalla, a su izquierda, un menú de opciones: Pacientes, Muestras, Muestras Destino, Análisis, Estadísticas y Tablas.

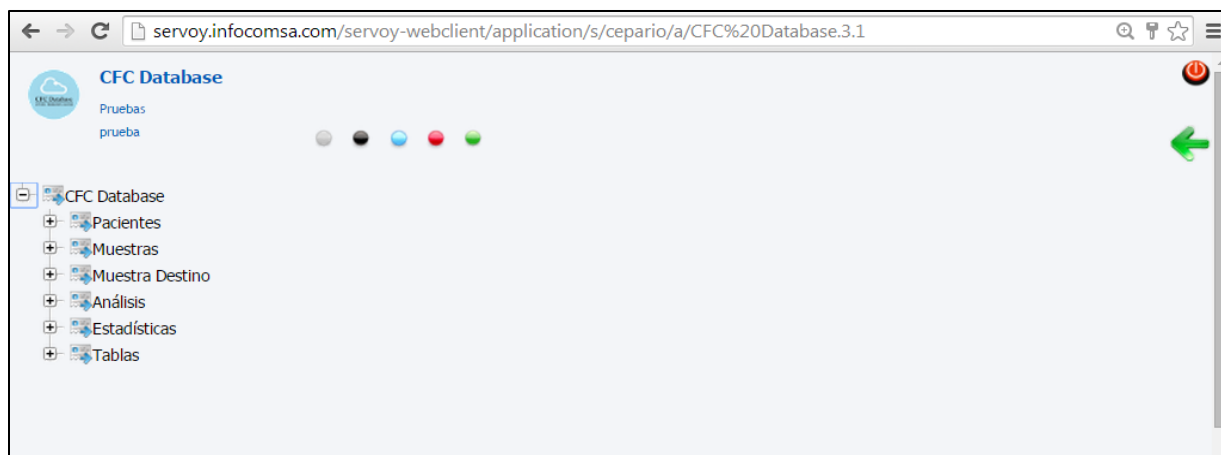

A la derecha de la pantalla, en la parte superior, siempre encontrará el símbolo de un botón rojo  que le permitirá salir de la aplicación y una flecha verde  que se utiliza para regresar a la página anterior.

# Manual para el uso de *CFC database*

## 1. Pacientes

### 1.1. Ingresar un paciente nuevo:

Clickee sobre el signo + a la izquierda de “Pacientes” para desplegar las opciones disponibles: Consulta o Detalles.

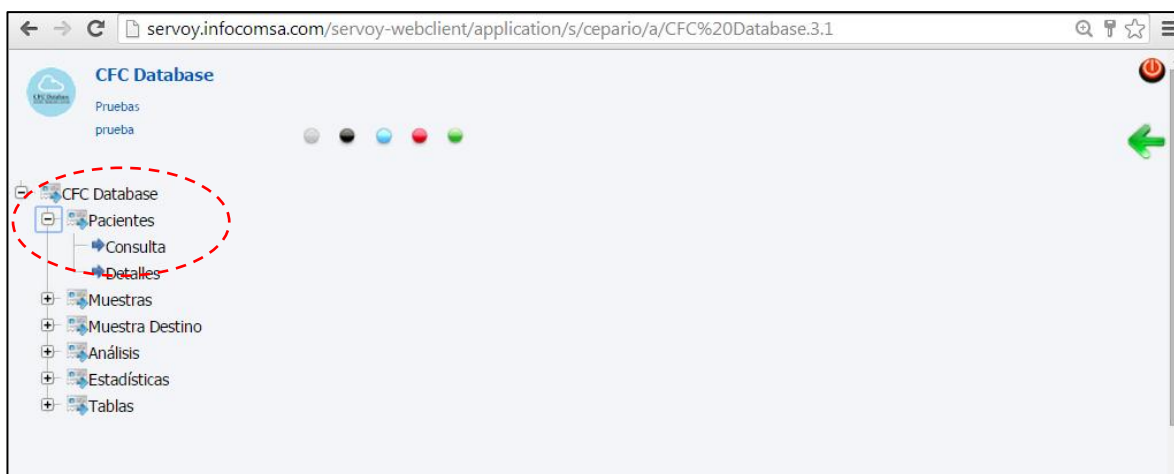

Clickee sobre la palabra “Detalles” a la izquierda en el Menú y luego la hoja en blanco arriba a la derecha:

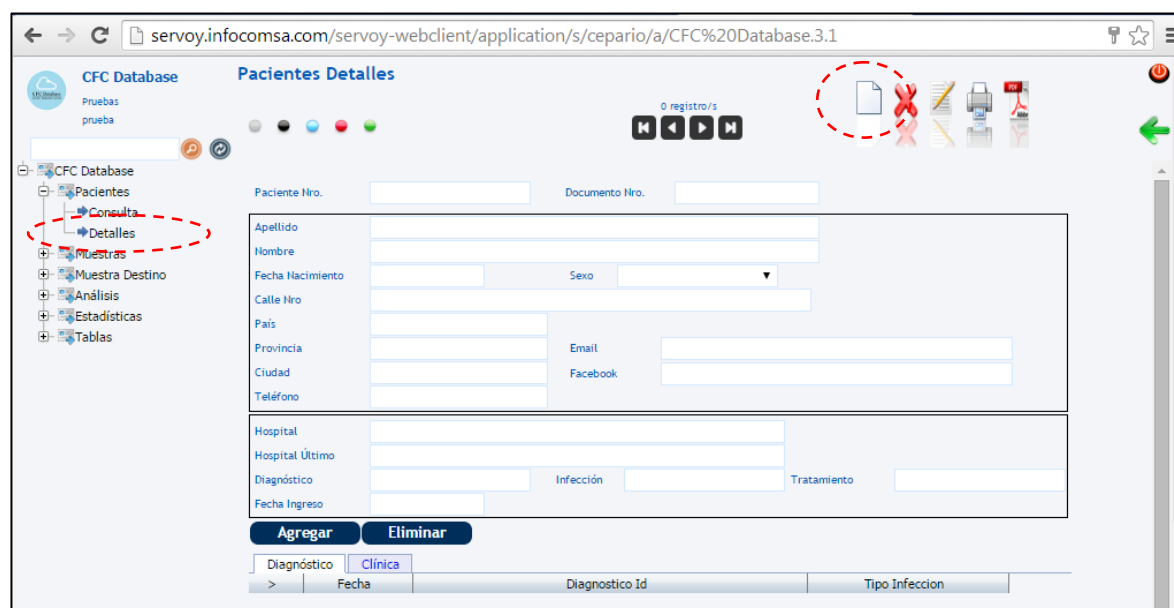

## Manual para el uso de *CFC database*

El sistema le otorgará automáticamente un número de paciente.

Ingresa los datos del paciente: Número de documento, Apellido, Nombre, Fecha de Nacimiento, Sexo, etc. El sistema le permite agregar, además el diagnóstico y los datos de la clínica del paciente.

Para agregar el diagnóstico, clickear en la palabra “Diagnóstico” y luego “Agregar”:

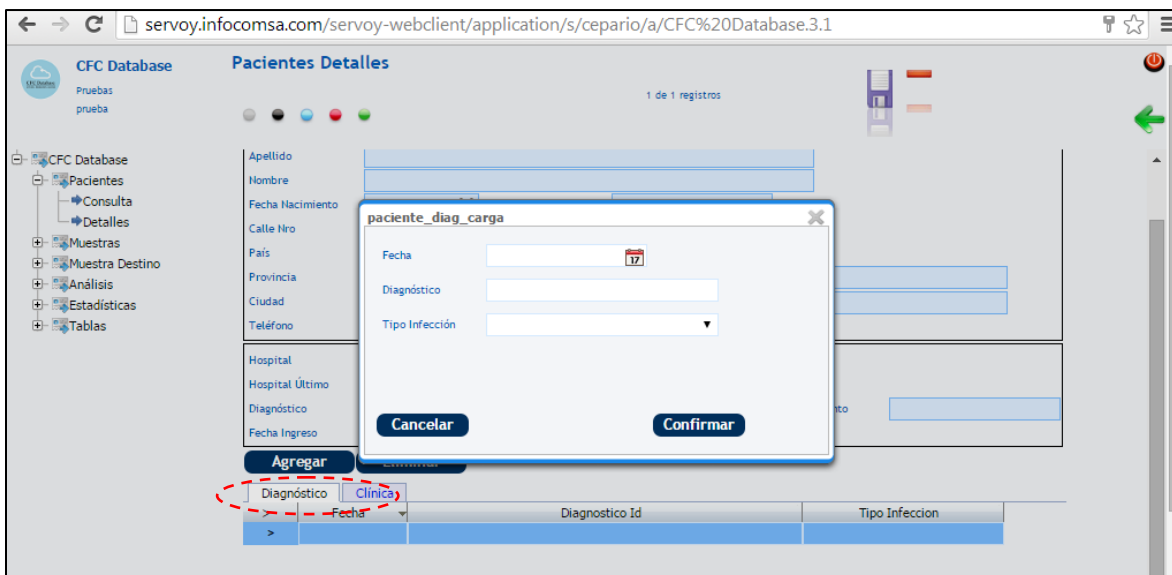

The screenshot shows the 'Pacientes Detalles' form in the CFC Database application. A modal window titled 'paciente\_diag\_carga' is open, prompting the user to enter patient diagnosis information. The modal includes fields for 'Fecha' (Date), 'Diagnóstico' (Diagnosis), and 'Tipo Infección' (Type of Infection). The 'Agregar' button is circled in red in the background form.

Completar la fecha, el diagnóstico y el tipo de infección y clickear sobre la palabra “Confirmar”.

Para agregarlos datos clínicos, clickear en la palabra “Clínica” y luego “Agregar”:

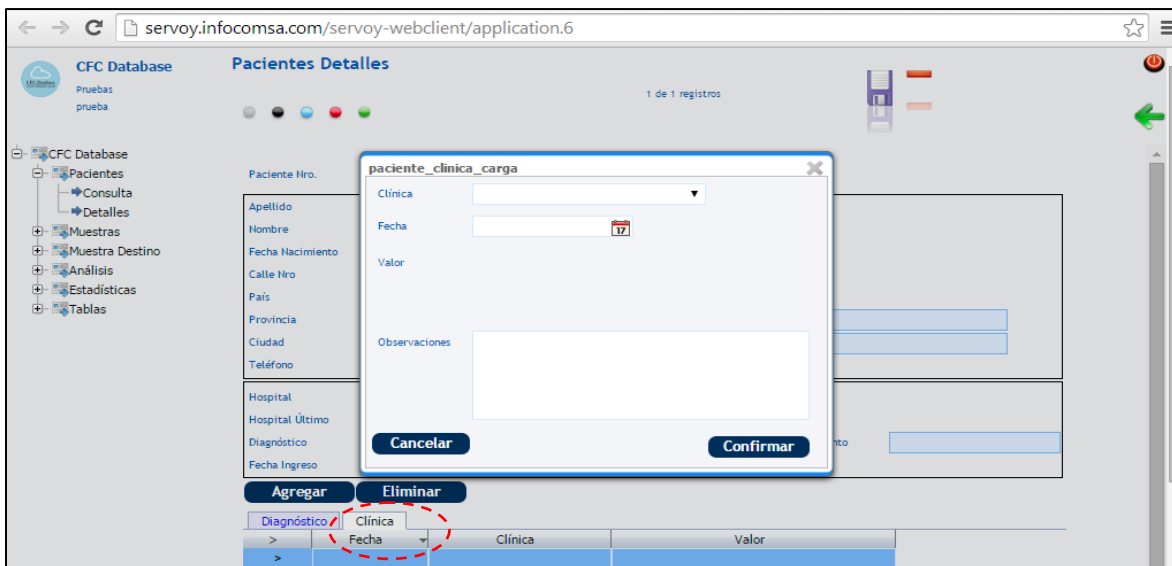

The screenshot shows the 'Pacientes Detalles' form in the CFC Database application. A modal window titled 'paciente\_clinica\_carga' is open, prompting the user to enter patient clinical data. The modal includes fields for 'Clínica' (Clinic), 'Fecha' (Date), 'Valor' (Value), and 'Observaciones' (Observations). The 'Agregar' button is circled in red in the background form.

## Manual para el uso de *CFC database*

Completar el tipo de dato clínico (opciones desplegadas), la fecha, el valor y las observaciones si son necesarias. Luego clicar sobre la palabra confirmar.

Una vez ingresados los datos, seleccionar el dibujo del diskette arriba a la derecha, que corresponde al comando **Guardar**. En caso de querer **Cancelar** el ingreso de los datos, seleccionar el dibujo de la hoja con borde rojo, ubicado a la derecha del dibujo del diskette.

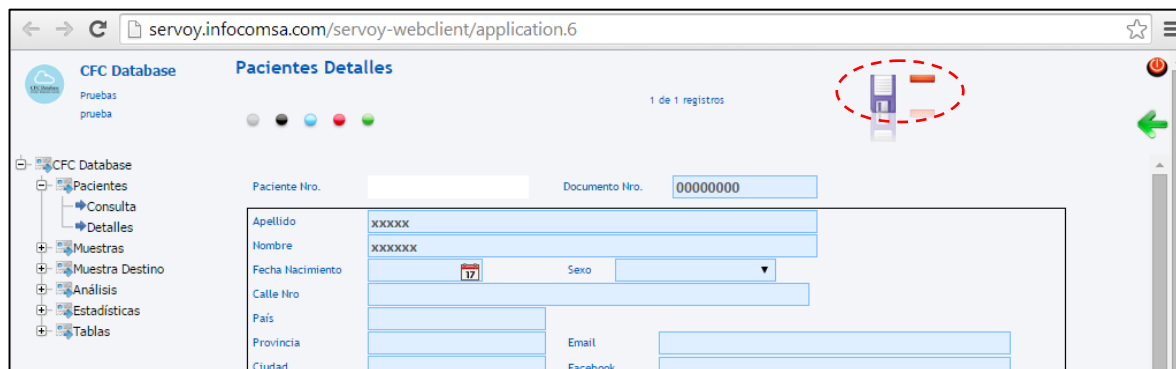

### 1.2. Buscar y modificar paciente ya ingresado

Clickee sobre el signo + a la izquierda de "Pacientes" para desplegar las opciones disponibles: Consulta o Detalles.

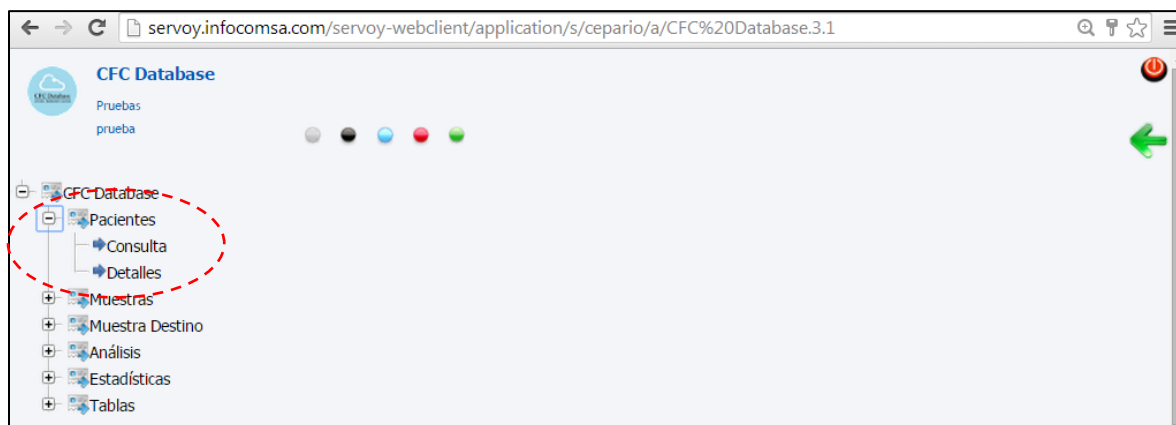

Clickee sobre la palabra "Consulta" a la izquierda en el Menú y luego complete el campo con el/los criterio/s de búsqueda: Nombre, Apellido, Documento, Hospital, Diagnóstico o Tipo de Infección y clickee sobre la palabra "Buscar"



# Manual para el uso de *CFC database*

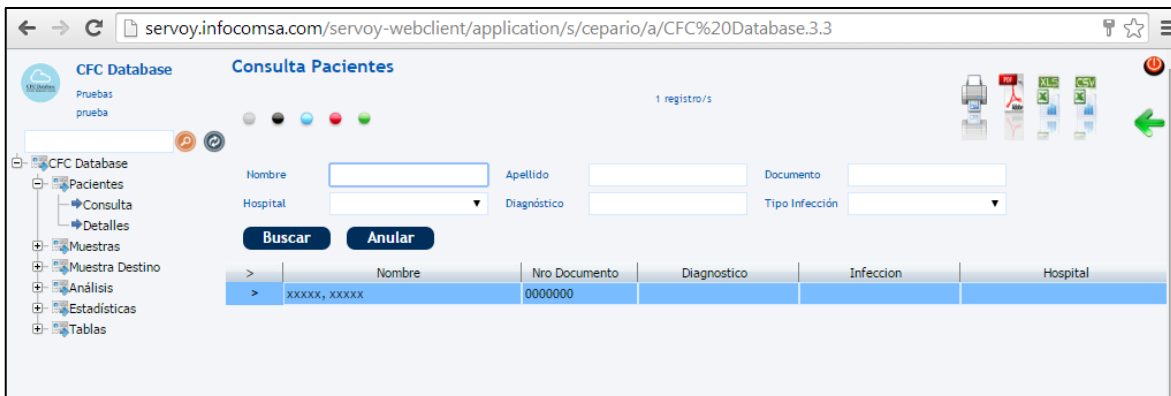

servoy.infocomsa.com/servoy-webclient/application/s/cepario/a/CFC%20Database.3.3

**CFC Database** **Consulta Pacientes**

1 registro/s

Nombre:  Apellido:  Documento:   
 Hospital:  Diagnóstico:  Tipo Infección:

**Buscar** **Anular**

| > | Nombre         | Nro Documento | Diagnostico | Infeccion | Hospital |
|---|----------------|---------------|-------------|-----------|----------|
| > | XXXXXX, XXXXXX | 0000000       |             |           |          |

Se desplegará una lista que incluya los pacientes según el criterio de búsqueda. Seleccione el paciente de su interés clickeando sobre el signo > que se encuentra a la izquierda del mismo:

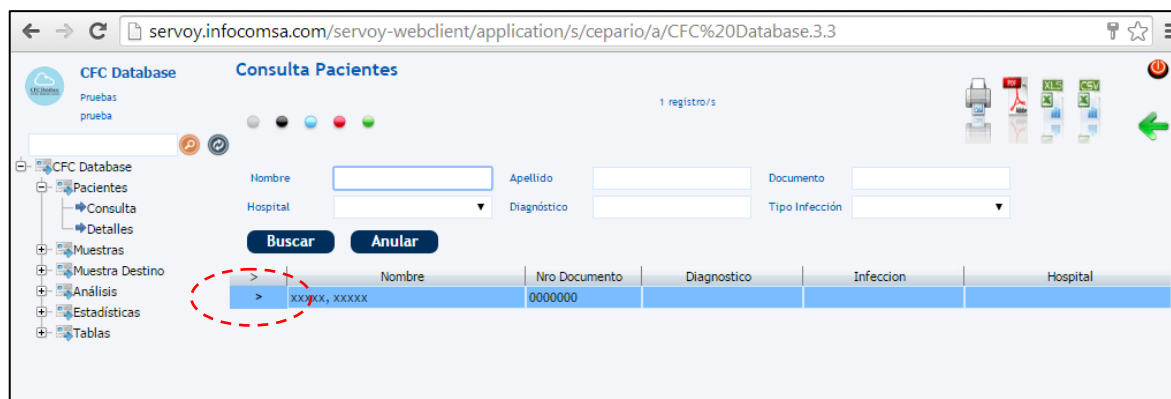

servoy.infocomsa.com/servoy-webclient/application/s/cepario/a/CFC%20Database.3.3

**CFC Database** **Consulta Pacientes**

1 registro/s

Nombre:  Apellido:  Documento:   
 Hospital:  Diagnóstico:  Tipo Infección:

**Buscar** **Anular**

| > | Nombre         | Nro Documento | Diagnostico | Infeccion | Hospital |
|---|----------------|---------------|-------------|-----------|----------|
| > | XXXXXX, XXXXXX | 0000000       |             |           |          |

Obtendrá una pantalla con los detalles de dicho paciente. Para modificar los datos seleccione el dibujo del papel y lápiz arriba a la derecha de la pantalla

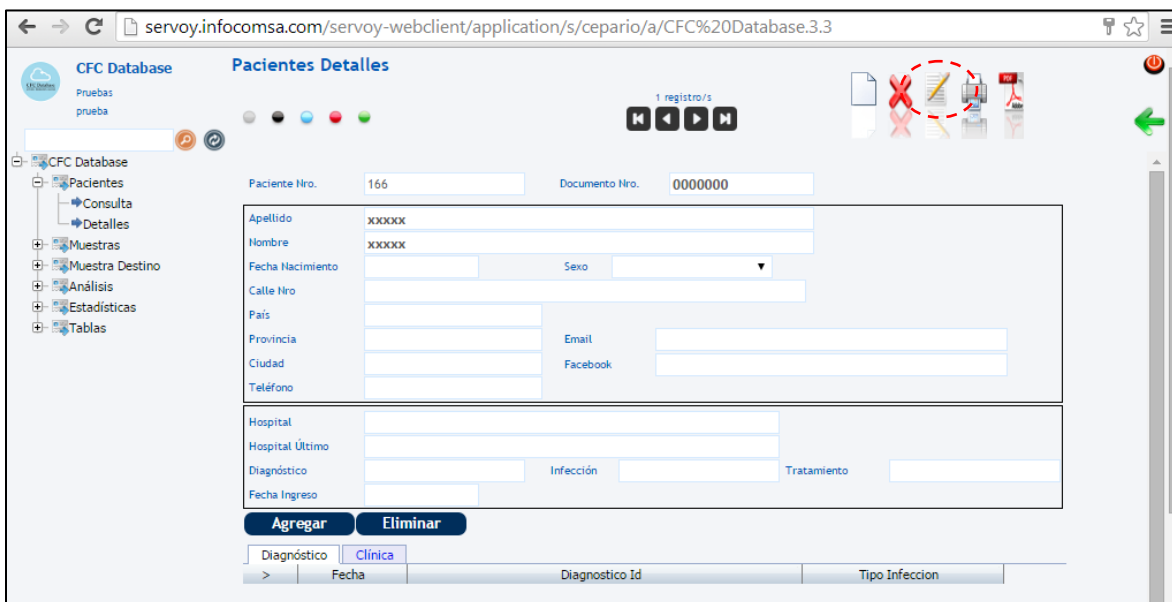

servoy.infocomsa.com/servoy-webclient/application/s/cepario/a/CFC%20Database.3.3

**CFC Database** **Pacientes Detalles**

1 registro/s

Paciente Nro. 166 Documento Nro. 0000000

Apellido: XXXXXX  
 Nombre: XXXXXX  
 Fecha Nacimiento:  Sexo:   
 Calle Hro:   
 País:   
 Provincia:  Email:   
 Ciudad:  Facebook:   
 Teléfono:

Hospital:   
 Hospital Último:   
 Diagnóstico:  Infección:  Tratamiento:

**Agregar** **Eliminar**

| Diagnóstico | Clinica | Diagnostico Id | Tipo Infeccion |
|-------------|---------|----------------|----------------|
| >           | Fecha   |                |                |

## Manual para el uso de *CFC database*

Luego modifique los datos existentes o agregue datos nuevos del paciente (ver sección 1.1. Ingresar un paciente nuevo).

Una vez ingresados los datos, seleccionar el dibujo del diskette arriba a la derecha, que corresponde al comando **Guardar**. En caso de querer **Cancelar** el ingreso de los datos, seleccionar el dibujo de la hoja con borde rojo, ubicado a la derecha del dibujo del diskette.

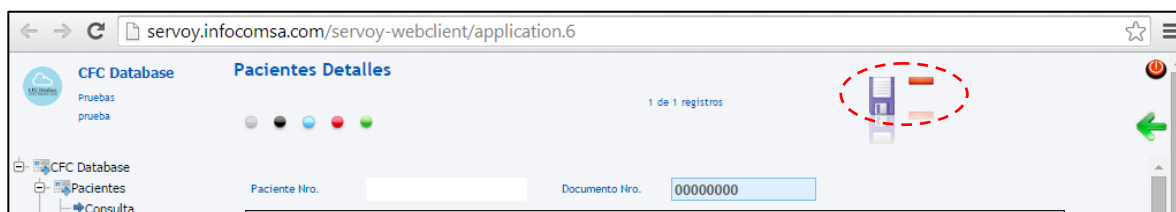

### 1.3. Eliminar paciente

Clickee sobre el signo + a la izquierda de "Pacientes" para desplegar las opciones disponibles: Consulta o Detalles.

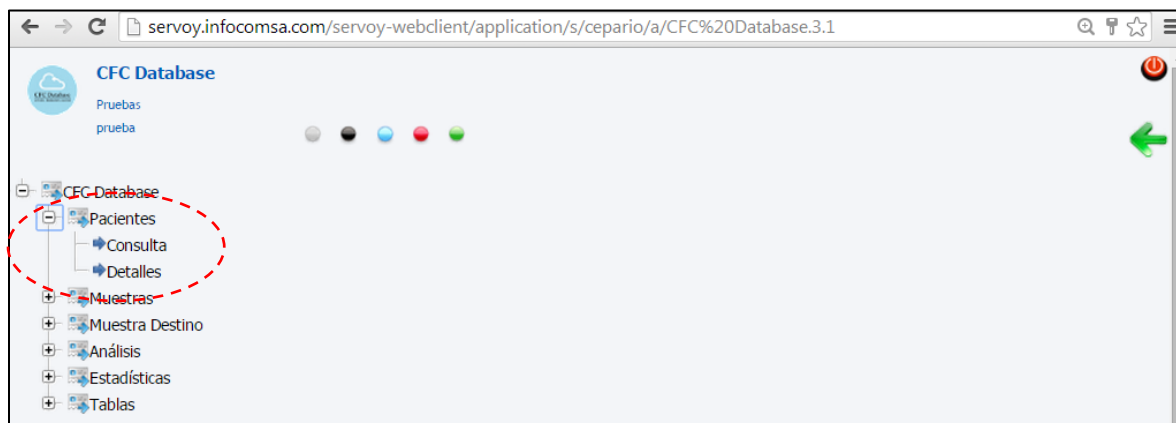

Clickee sobre la palabra "Consulta" a la izquierda en el Menú y luego complete el campo con el/los criterio/s de búsqueda: Nombre, Apellido, Documento, Hospital, Diagnóstico o Tipo de Infección y clickee sobre la palabra "Buscar"

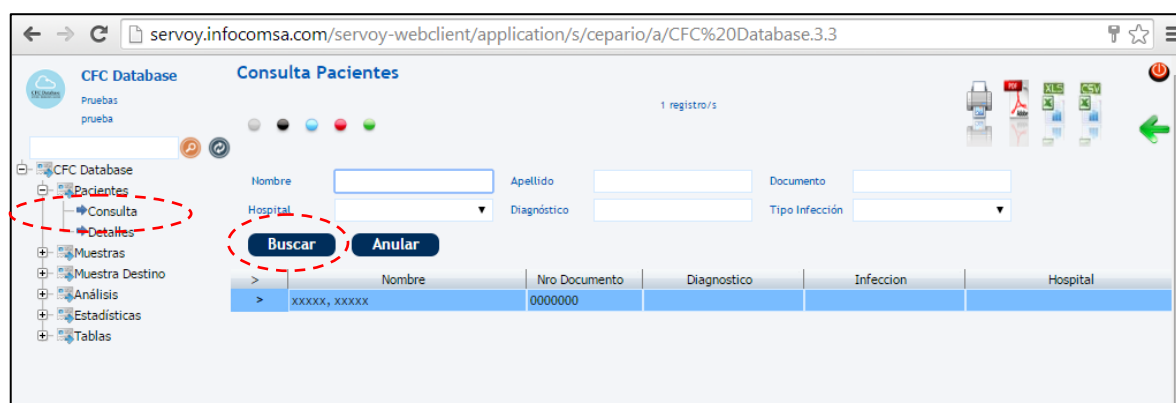

Se desplegará una lista que incluya los pacientes según el criterio de búsqueda.

## Manual para el uso de *CFC database*

Seleccione el paciente de su interés clickeando sobre el signo > que se encuentra a la izquierda del mismo:

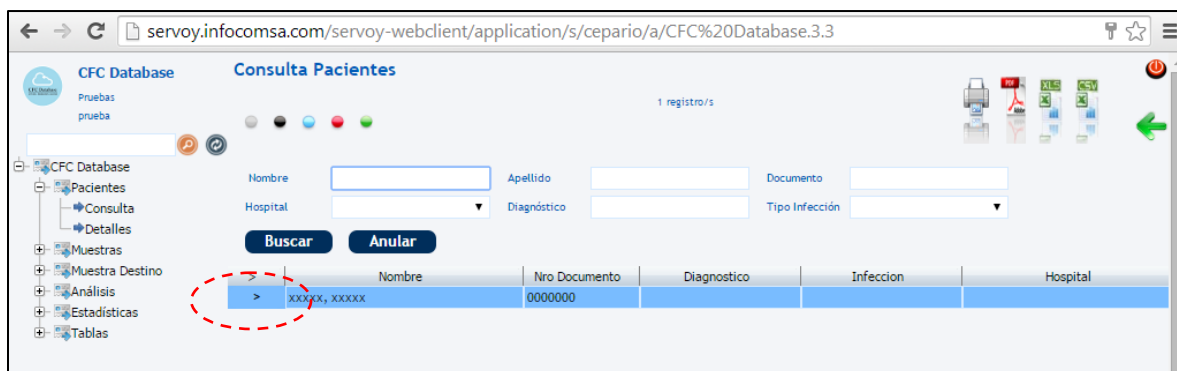

Obtendrá una pantalla con los detalles de dicho paciente. Para eliminar el mismo seleccione el dibujo de la X roja arriba a la derecha de la pantalla.

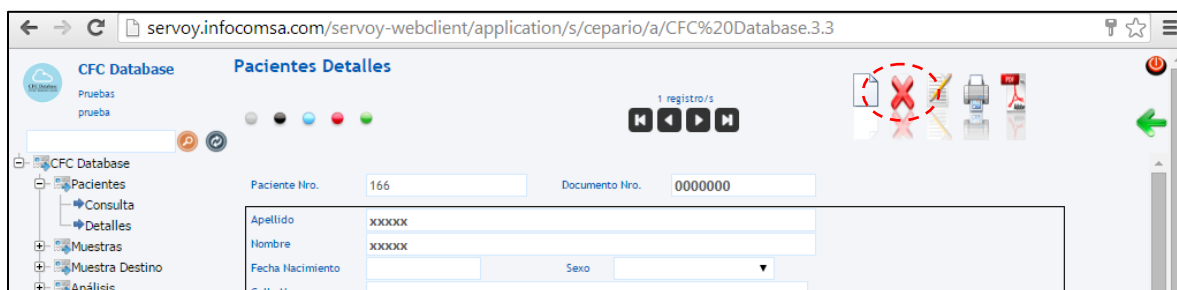

El sistema le pedirá que confirme la baja del registro: clickee sobre la opción "Si".

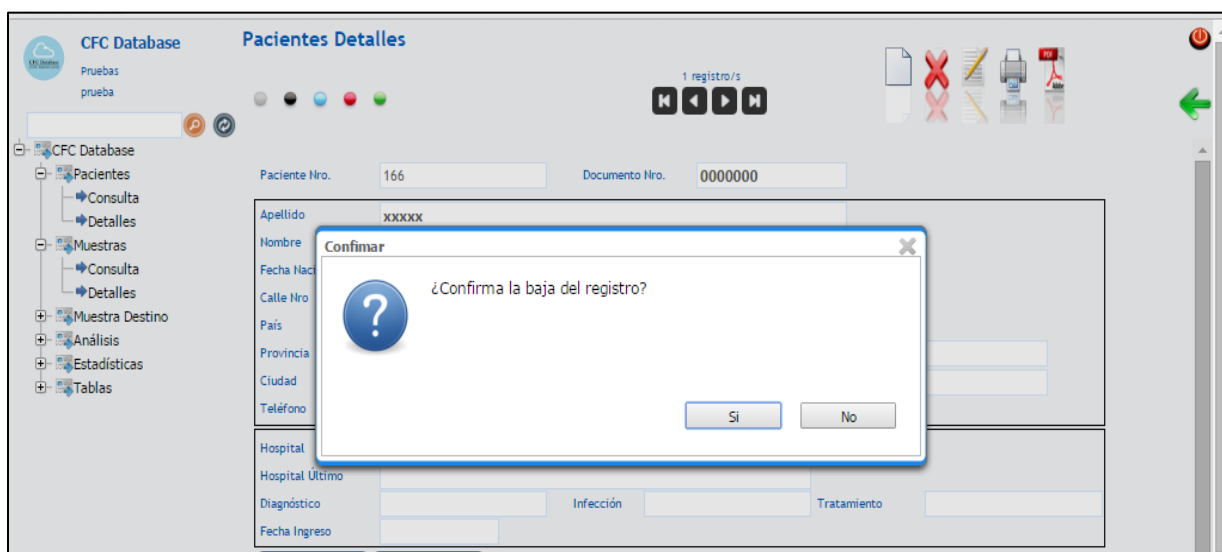

# Manual para el uso de *CFC database*

## 2. Muestras

### 2.1. Ingresar una muestra nueva:

Clickee sobre el signo + a la izquierda de “Muestras” para desplegar las opciones disponibles: Consulta o Detalles.

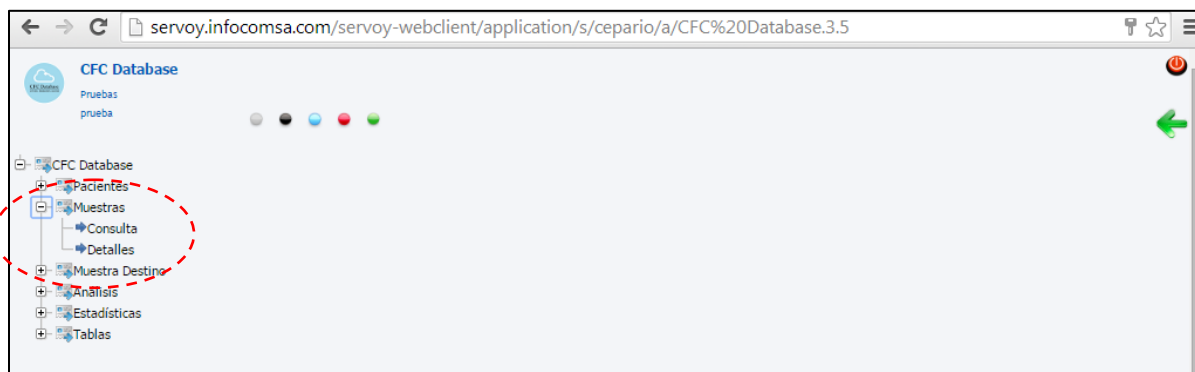

Clickee sobre la palabra “Consulta” a la izquierda en el Menú y luego la hoja en blanco arriba a la derecha:

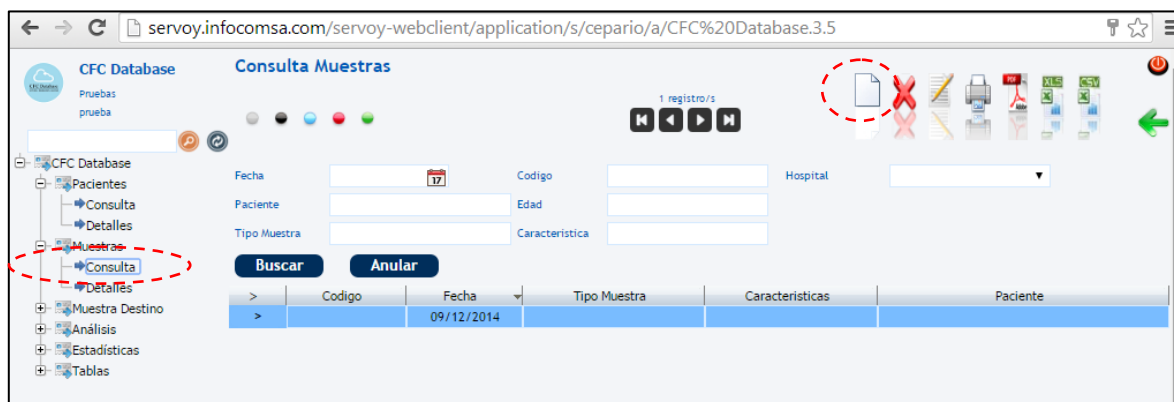

## Manual para el uso de *CFC database*

El sistema le desplegara la siguiente pantalla:

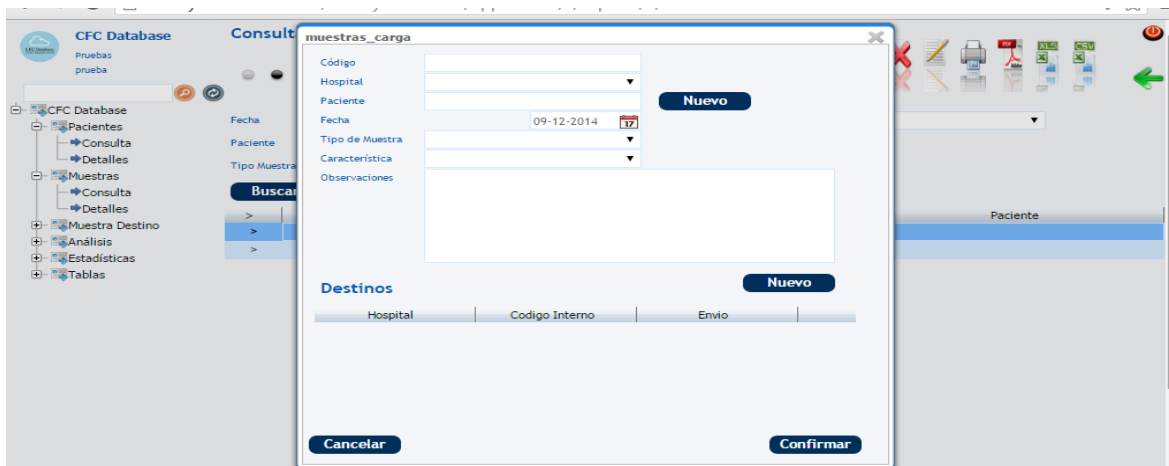

Ingresa los datos de la muestra: Código (Identificación de la muestra), Hospital, Paciente, Fecha, Tipo de Muestra, Característica y Observaciones.

El sistema le permite agregar, desde esta pantalla, un paciente nuevo y uno o varios destinos donde se derivará la muestra. Para realizarlo, se debe clicar en los recuadros azules con la palabra “Nuevo”

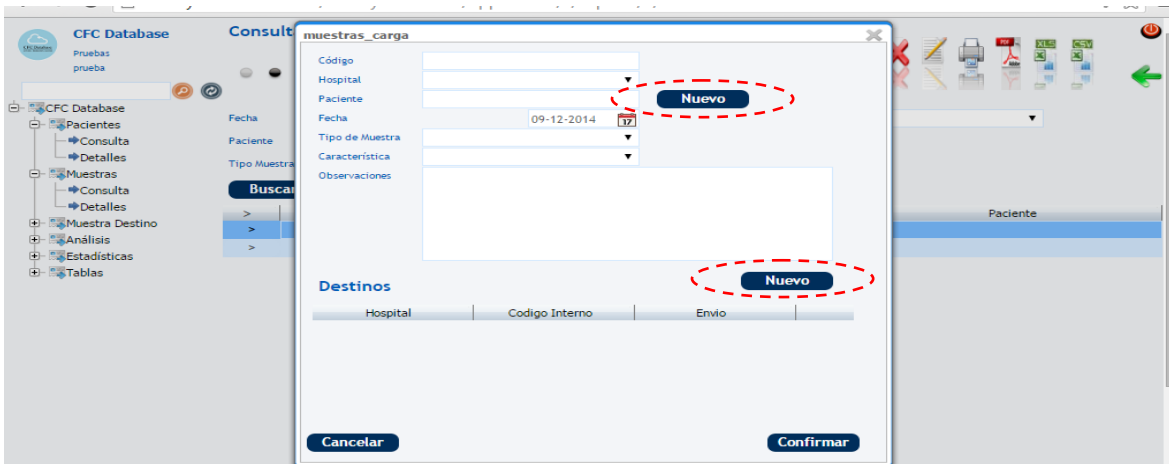

Una vez ingresados los datos, seleccionar la palabra “Confirmar”.

El sistema le indicará que la muestra fue cargada correctamente. Seleccione la palabra “Ok”.

## Manual para el uso de *CFC database*

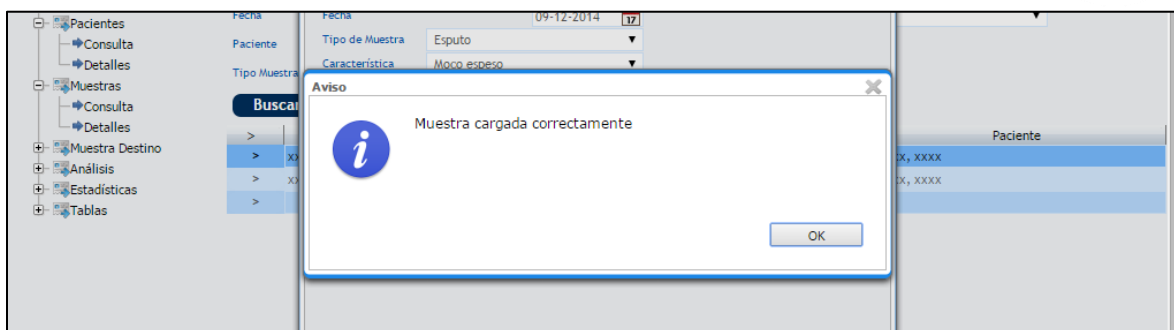

### 2.2. Ingresar destinos en muestras ya cargadas

Clickee sobre el signo + a la izquierda de "Muestras" para desplegar las opciones disponibles: Consulta o Detalles.

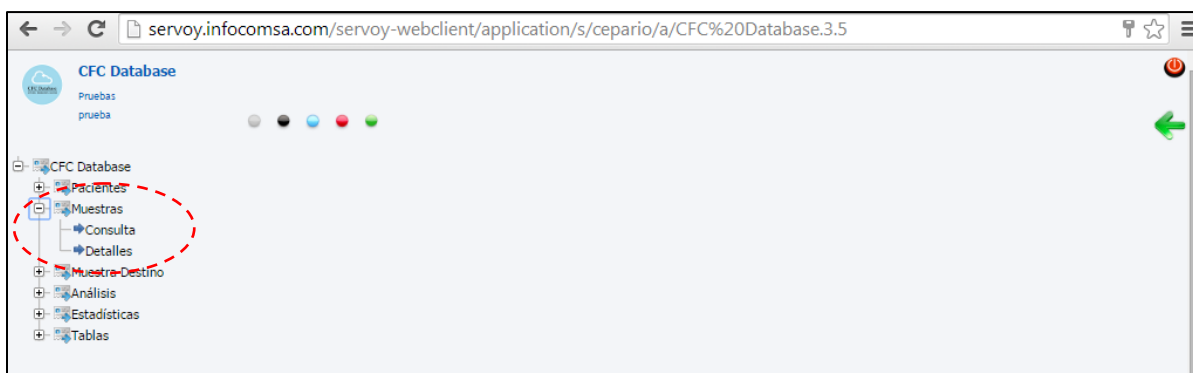

Clickee sobre la palabra "Consulta" a la izquierda en el Menú y luego complete el campo con el/los criterio/s de búsqueda: Fecha, Código, Hospital, Paciente, Edad, Tipo de Muestra o Característica y clickee sobre la palabra "Buscar".

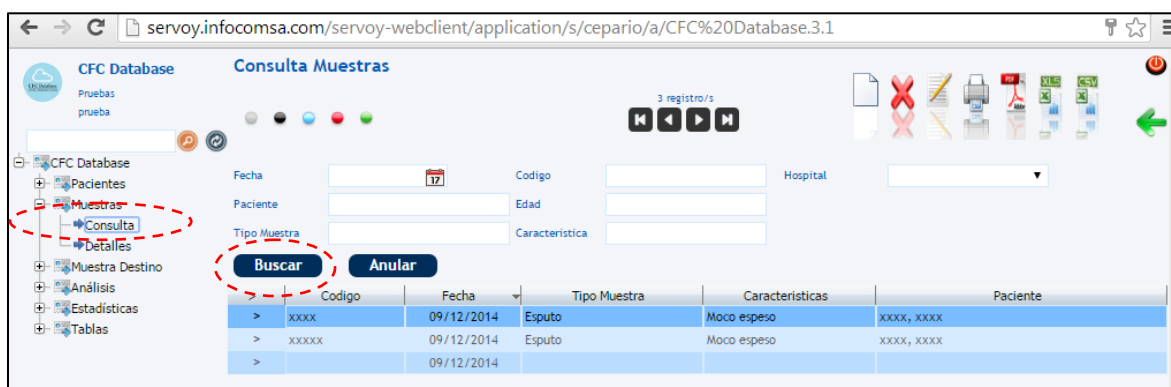

Se desplegará una lista que incluya las muestras según el criterio de búsqueda. Seleccione la muestra de su interés clickeando sobre el signo > que se encuentra a la izquierda de la misma:

# Manual para el uso de *CFC database*

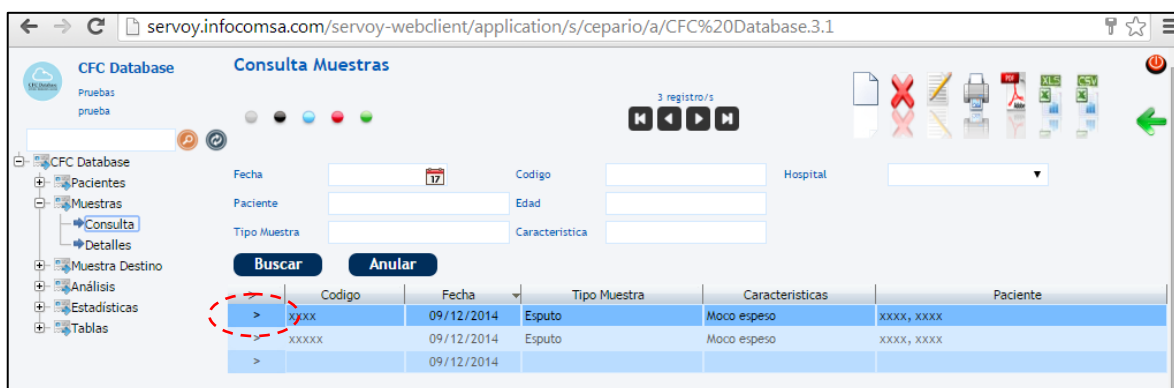

Obtendrá una pantalla con los detalles de dicha muestra.

Para modificar los datos de la muestra seleccione el dibujo del papel y lápiz arriba a la derecha de la pantalla.

Para agregar un nuevo destino clickee en la palabra “Agregar”, abajo a la derecha de la pantalla.

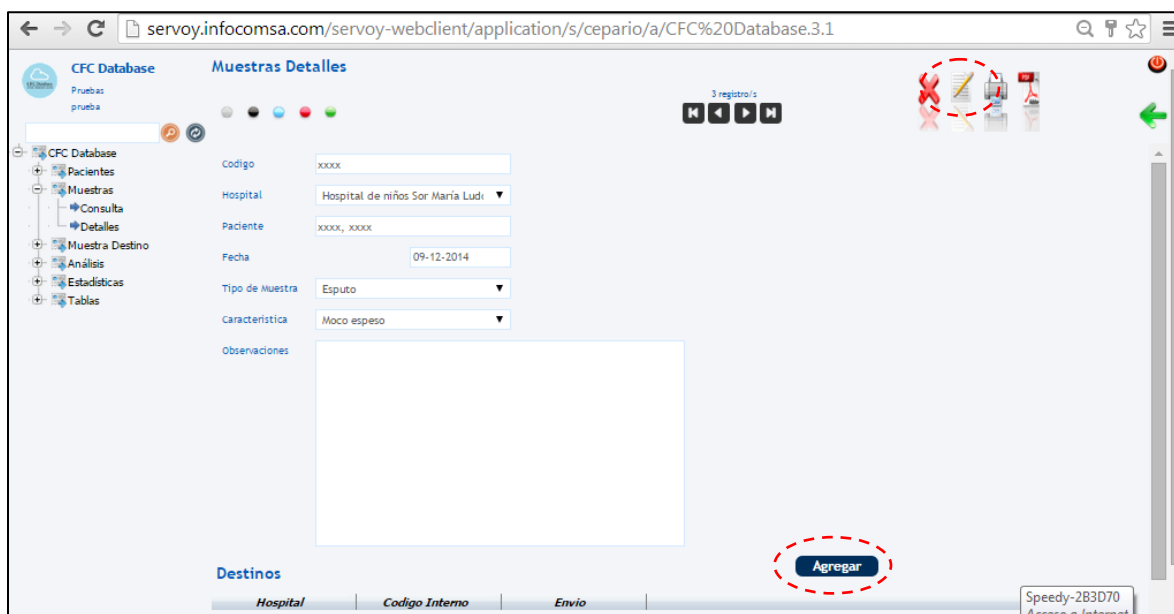

Se desplegará la siguiente pantalla:

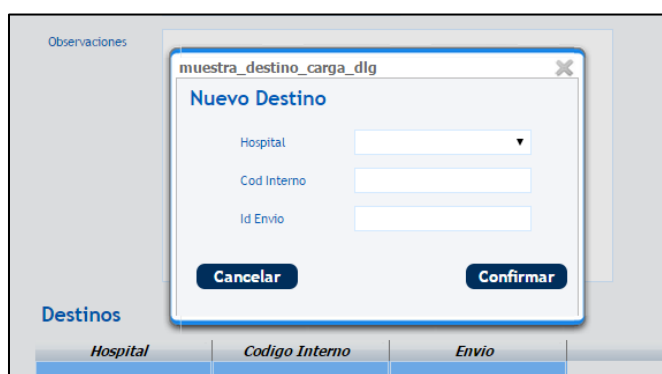

# Manual para el uso de *CFC database*

Esta opción le permitirá ingresar el nuevo hospital donde se derivará la muestra, el código interno con el cual se derivará la misma y el Id del envío.

Una vez ingresados los datos, seleccionar la palabra **Confirmar**. El código interno puede ser modificado posteriormente por el Hospital que recibe las muestras derivadas, si éste utilizara uno diferente.

## 3. Muestras destino

### 3.1. Ingresar análisis en muestras destino:

Clickee sobre el signo + a la izquierda de “Muestras Destino” para desplegar las opciones disponibles: Consulta o Detalles.

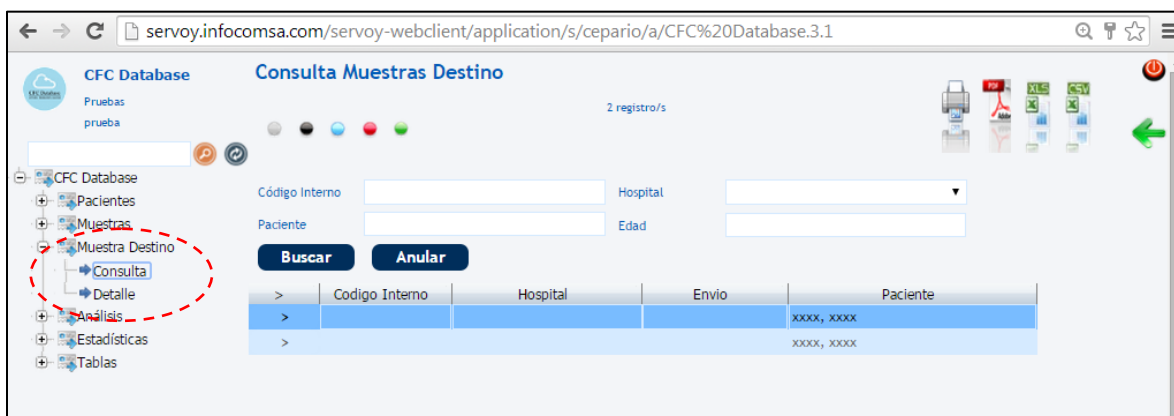

servoy.infocomsa.com/servoy-webclient/application/s/cepario/a/CFC%20Database.3.1

**CFC Database** Consultar Muestras Destino

2 registro/s

Código Interno:  Hospital:

Paciente:  Edad:

**Buscar** **Anular**

| > | Codigo Interno | Hospital | Envio | Paciente   |
|---|----------------|----------|-------|------------|
| > |                |          |       | XXXX, XXXX |
| > |                |          |       | XXXX, XXXX |

Clickee sobre la palabra “Consulta” a la izquierda en el Menú y luego complete el campo con el/los criterio/s de búsqueda: Código Interno, Hospital, Paciente o Edad y clickee sobre la palabra “Buscar”



## Manual para el uso de *CFC database*

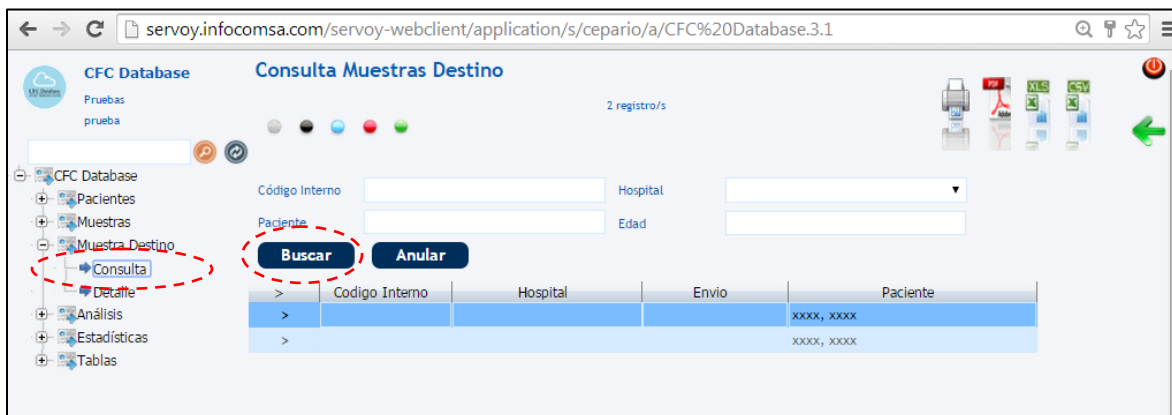

Se desplegará una lista que incluya las muestras destino según el criterio de búsqueda. Seleccione la muestra destino de su interés clickeando sobre el signo > que se encuentra a la izquierda de la misma:

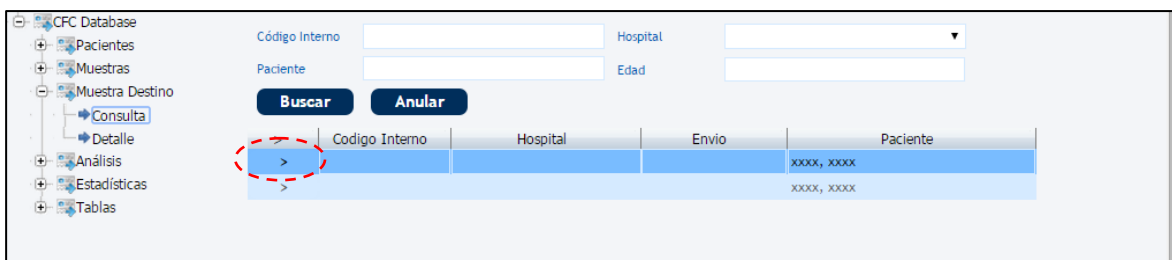

Obtendrá una pantalla con los detalles de dicha muestra. Para modificar los datos de la muestra destino seleccione el dibujo del papel y lápiz arriba a la derecha de la pantalla.

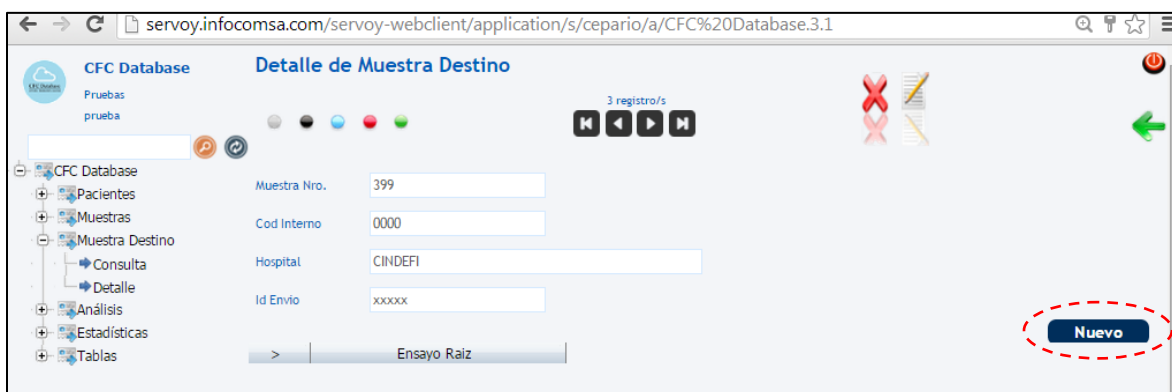

Para agregar un nuevo Análisis clickee en la palabra “Nuevo”, abajo a la derecha de la pantalla.

Se desplegará una pantalla que le permitirá ingresar los análisis realizados a las muestras destino.

## Manual para el uso de *CFC database*

Coloque el cursor sobre el espacio en blanco a la derecha de “Ensayo Raíz” y elija de las opciones disponibles el análisis de su interés.

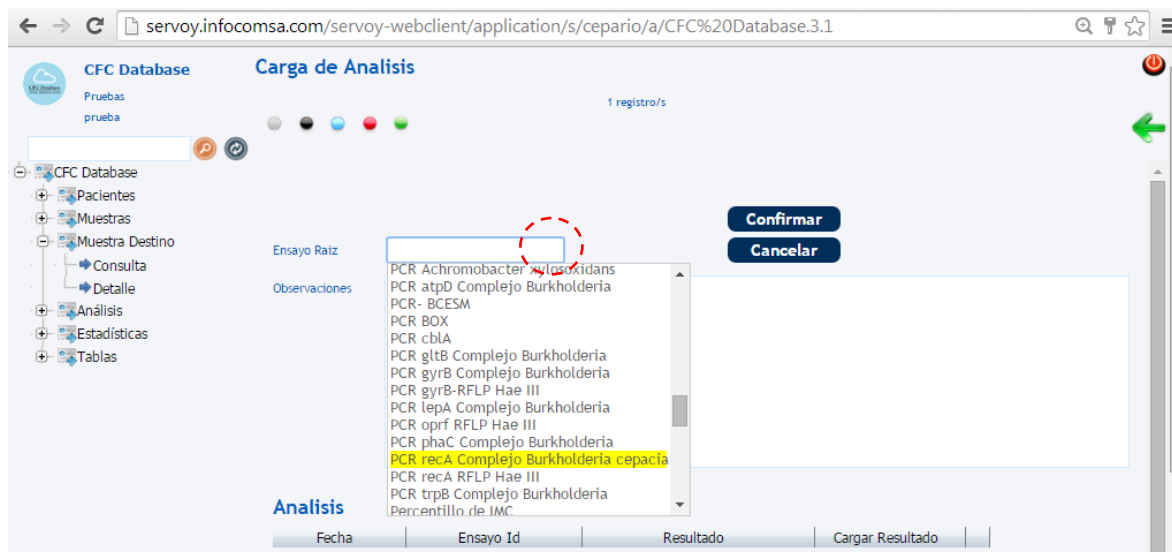

Una vez elegido el Ensayo, se pueden cargar los resultados y la fecha de realización del mismo en la parte inferior de la pantalla. Según el tipo de ensayo pueden cargarse también imágenes o archivos relacionados con la determinación.

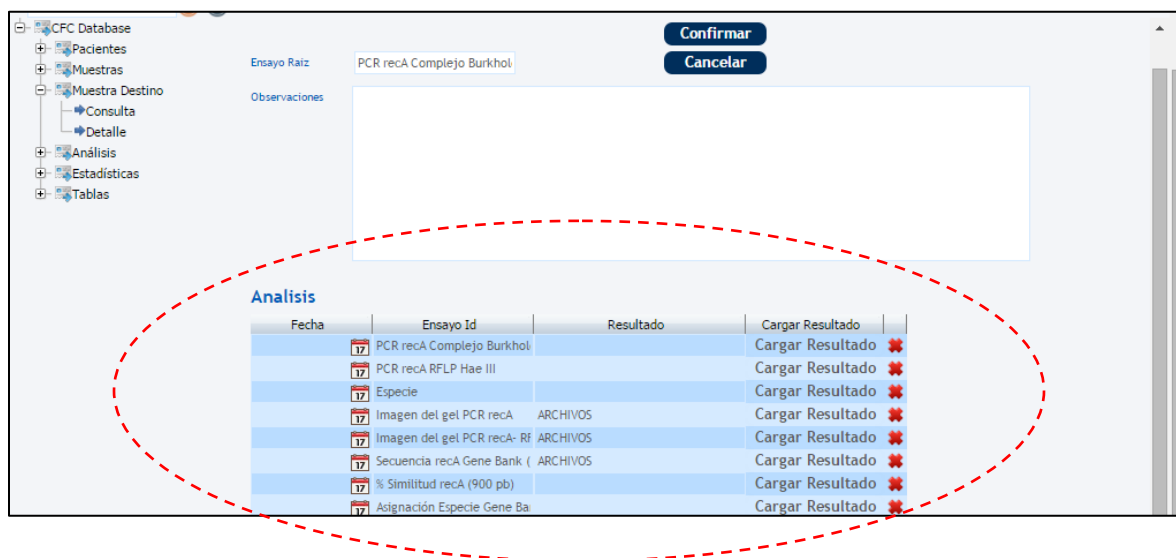

Una vez ingresados los datos, seleccione la palabra **Confirmar**.

El sistema le indicará que la muestra fue cargada correctamente. Seleccione la palabra “Ok”.

# Manual para el uso de *CFC database*

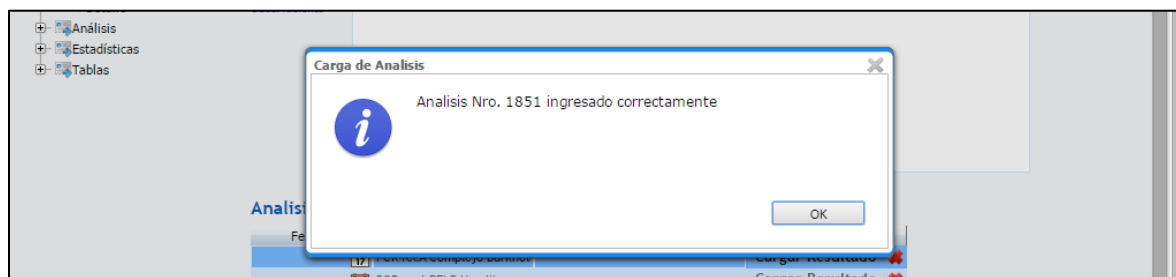

## 4. Análisis

### 4.1. Consultar análisis en muestras destino:

Clickee sobre el signo + a la izquierda de “Análisis ” para desplegar la opción disponible: Consulta.

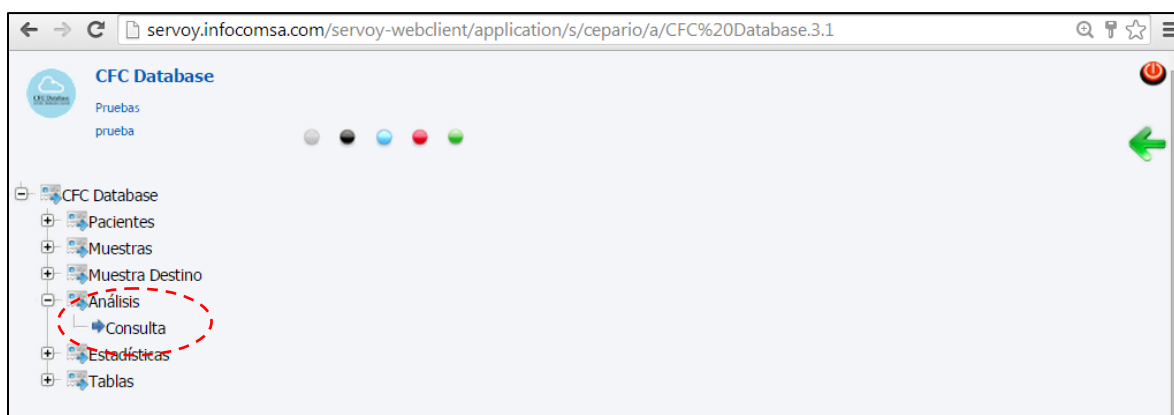

Clickee sobre la palabra “Consulta” a la izquierda en el Menú y luego complete el campo con el/los criterio/s de búsqueda: Paciente, Edad, Hospital, Código, Año, Tipo de Muestra o Ensayo. Clickee sobre la palabra “Buscar”.

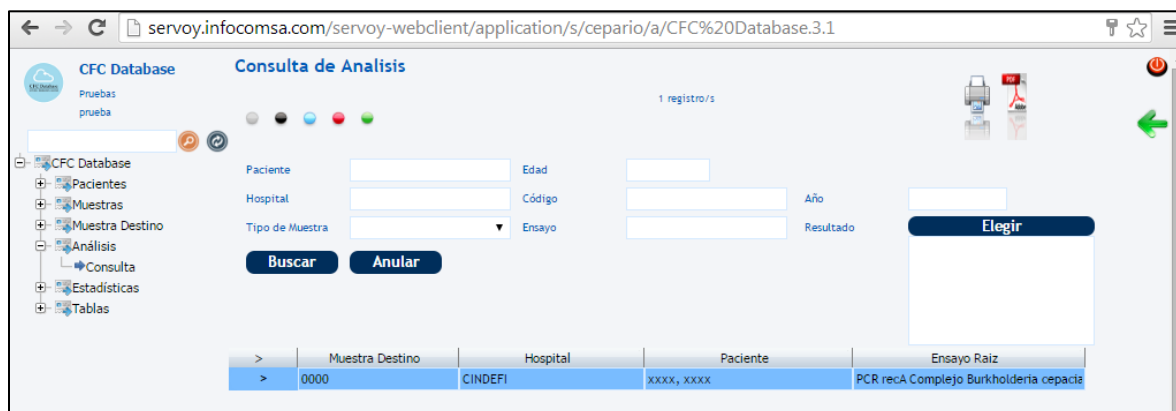

## Manual para el uso de *CFC database*

Al seleccionar un ensayo también podemos consultar todas las muestras que den determinado resultado. *Por ej:* seleccionamos la opción **PCR recA Complejo *Burkholderia cepacia*** y luego clickeamos en la palabra **Elegir**, a la derecha de **Resultado**.

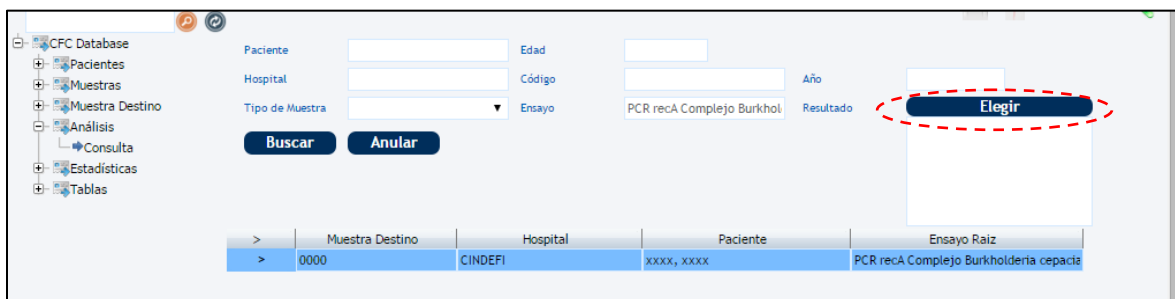

Se desplegará una pantalla que le permite seleccionar el resultado del análisis. También permite incluir todos los resultados. Seleccione la opción deseada y clickee en **Aceptar**.

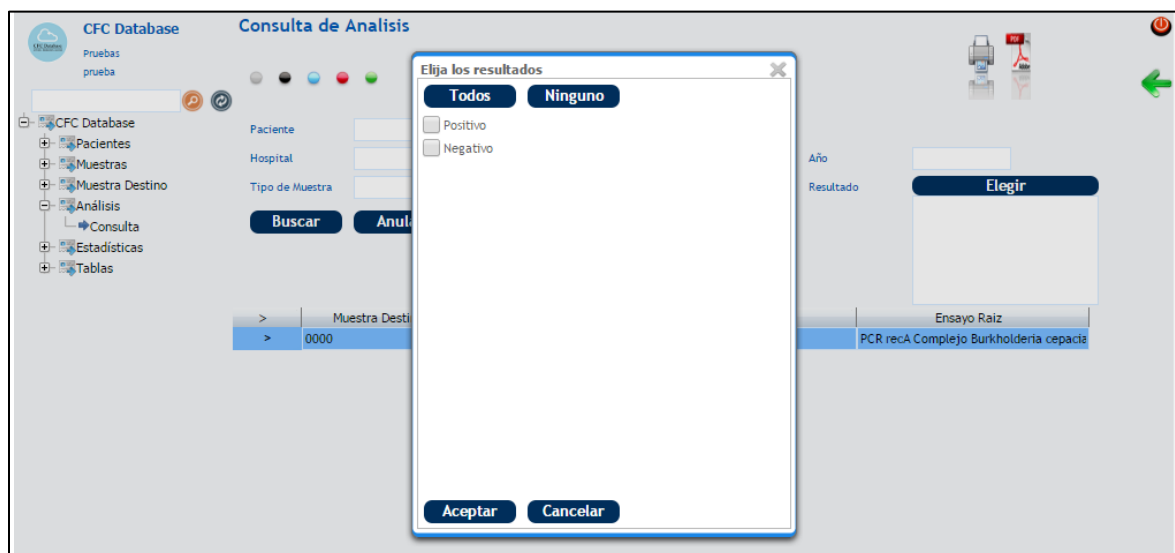

Una vez seleccionados el/los criterio/s de búsqueda, seleccione la palabra "Buscar".

Se desplegará una lista que incluya las muestras destino según el criterio de búsqueda. Esos datos se pueden Imprimir o Exportar (en formato pdf) eligiendo los iconos correspondientes arriba a la derecha de la pantalla.

# Manual para el uso de CFC database

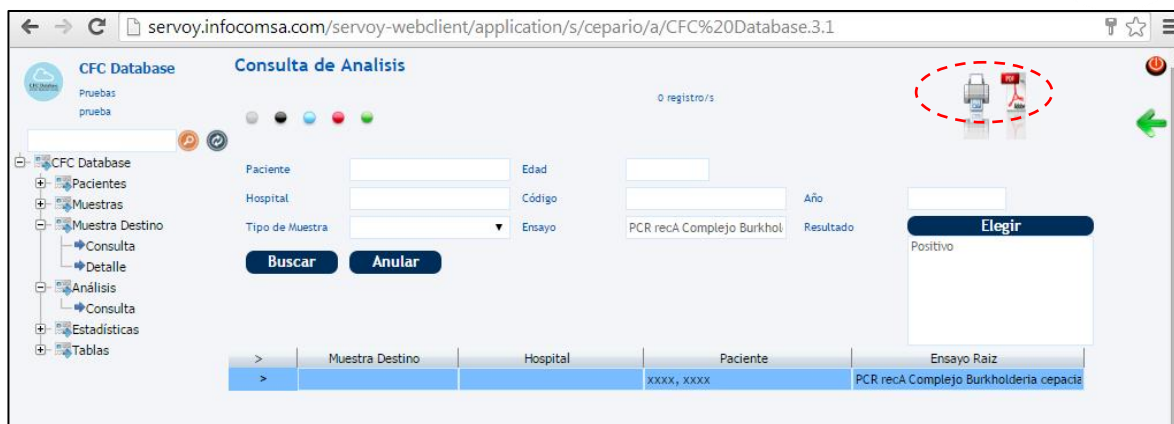

También puede seleccionar muestras destino de la lista clickeando sobre el signo > que se encuentra a la izquierda de la misma:

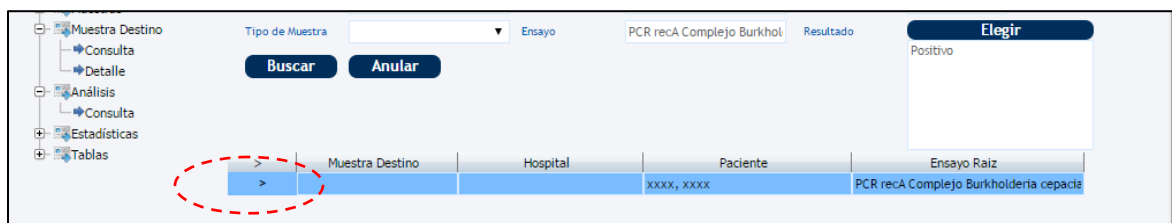

Obtendrá una pantalla con los detalles de dicha muestra.

Para modificar los datos de la muestra destino seleccione el dibujo del papel y lápiz arriba a la derecha de la pantalla.

Para consultar los resultados de los análisis, diríjase abajo en la pantalla y clickee sobre el signo > que se encuentra a la izquierda del análisis de su interés.

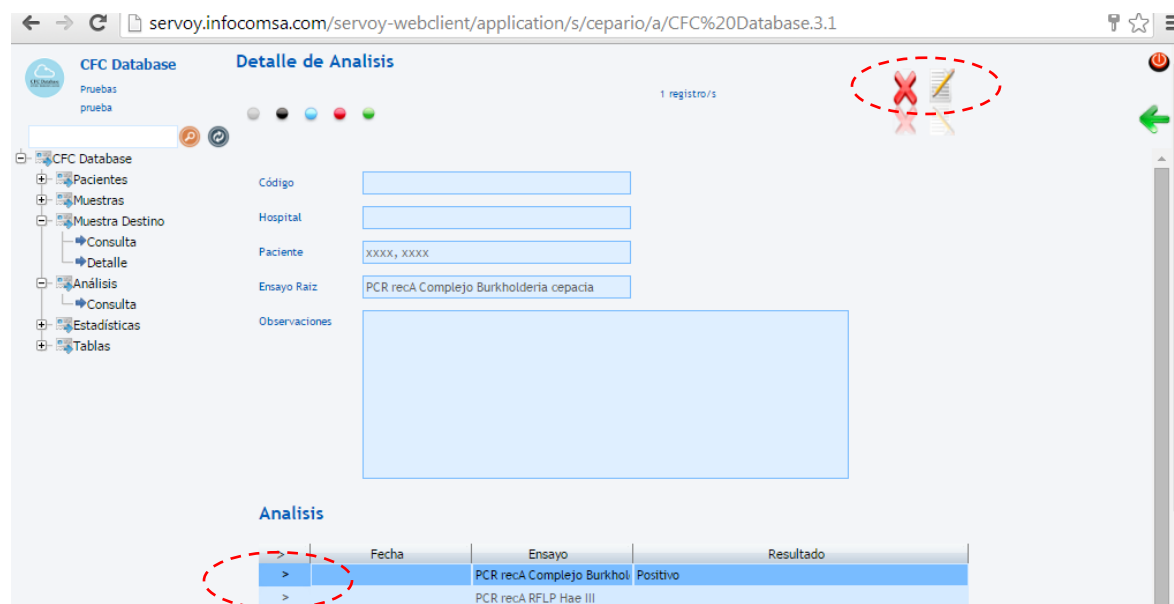

# Manual para el uso de *CFC database*

## 5. Estadísticas

### 5.1. Obtener estadísticas por resultados del ensayo:

Clickee sobre el signo + a la izquierda de “Estadísticas” para desplegar las opciones disponibles: Ensayo/Resultado o Ensayo/Pacientes.

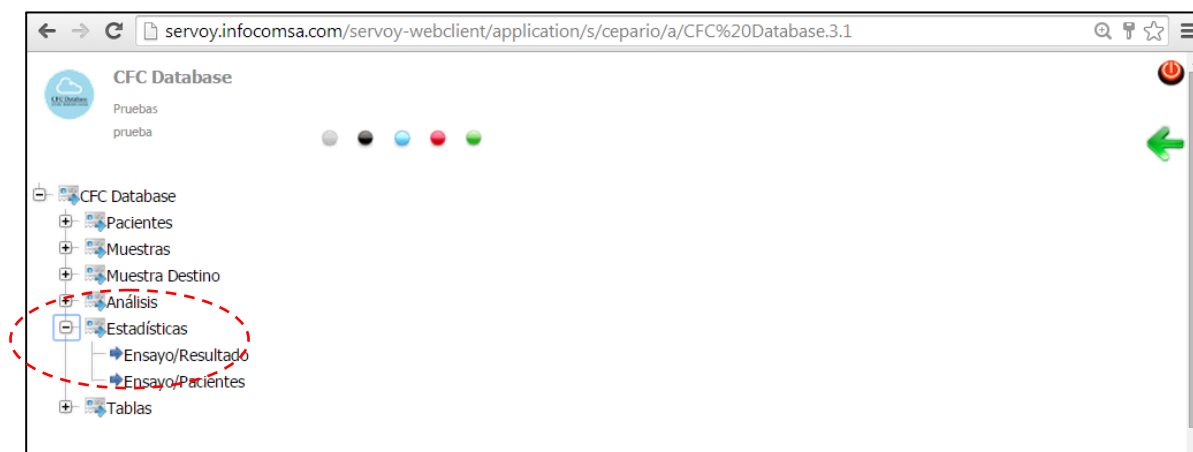

Clickee sobre la opción “Ensayo/Resultado” y obtendrá la siguiente pantalla:

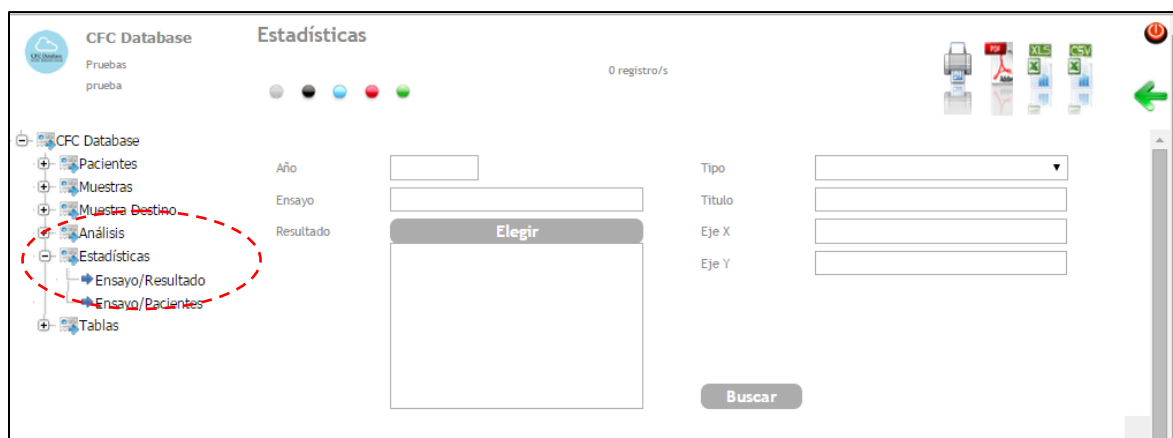

Complete todos los datos en la pantalla : Año, Ensayo, Resultado del Ensayo, Tipo de Gráfico (Barras, Torta o Línea), Título del Gráfico y de los ejes X e Y.

Luego presione la palabra “Buscar” abajo a la derecha y obtendrá el gráfico solicitado y tablas con los datos correspondientes.

# Manual para el uso de *CFC database*

Por ej:

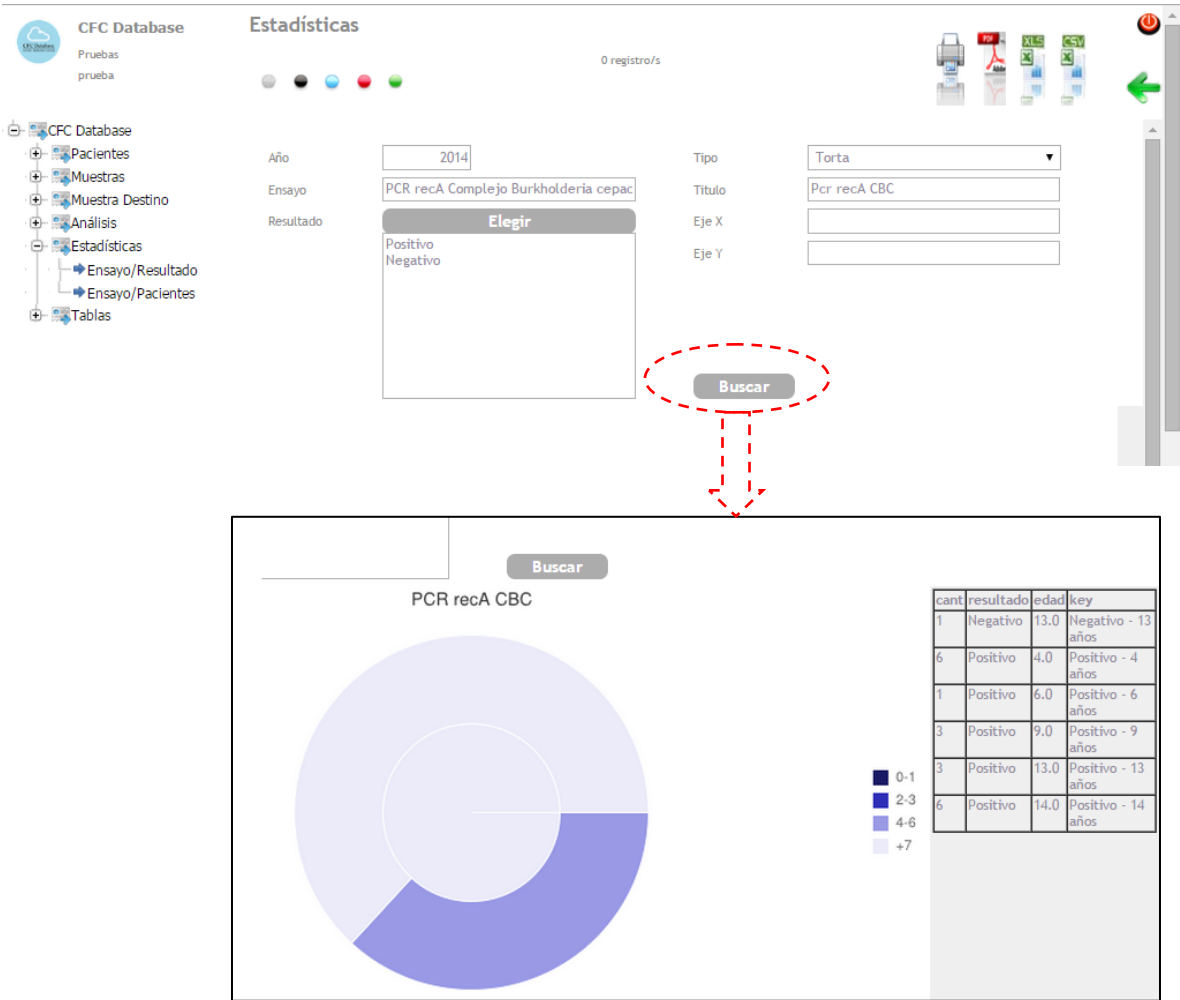

Una vez obtenidos los datos se pueden Imprimir o Exportar en formato pdf, xls o cvs seleccionando los símbolos que se encuentran arriba a la derecha de la pantalla.

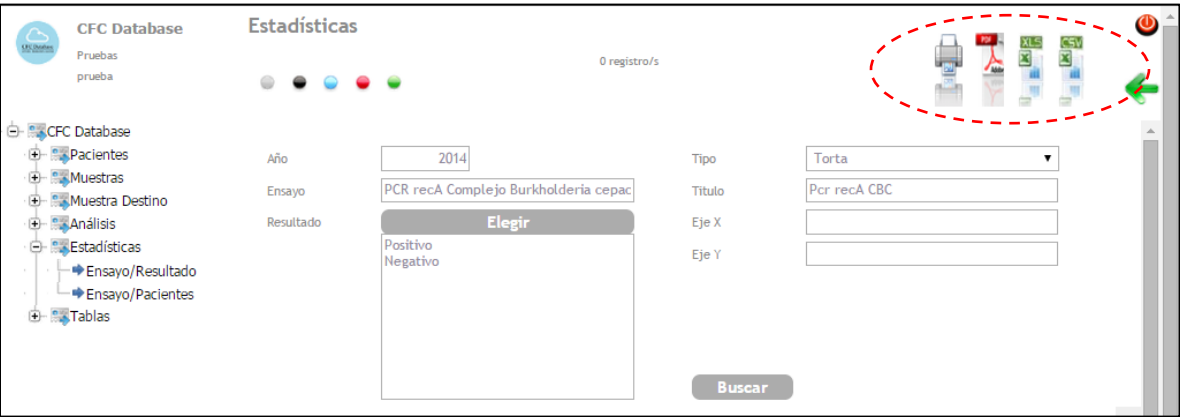

## Manual para el uso de *CFC database*

### 5.2. Obtener estadísticas por pacientes:

Clickee sobre el signo + a la izquierda de “Estadísticas” para desplegar las opciones disponibles: Ensayo/Resultado o Ensayo/Pacientes.

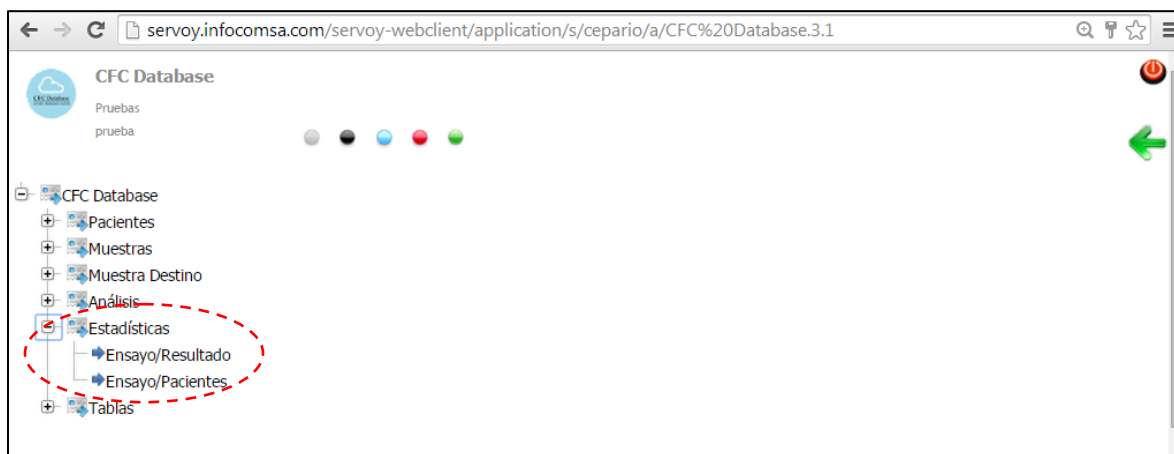

Clickee sobre la opción “Ensayo/Paciente” y obtendrá la siguiente pantalla:

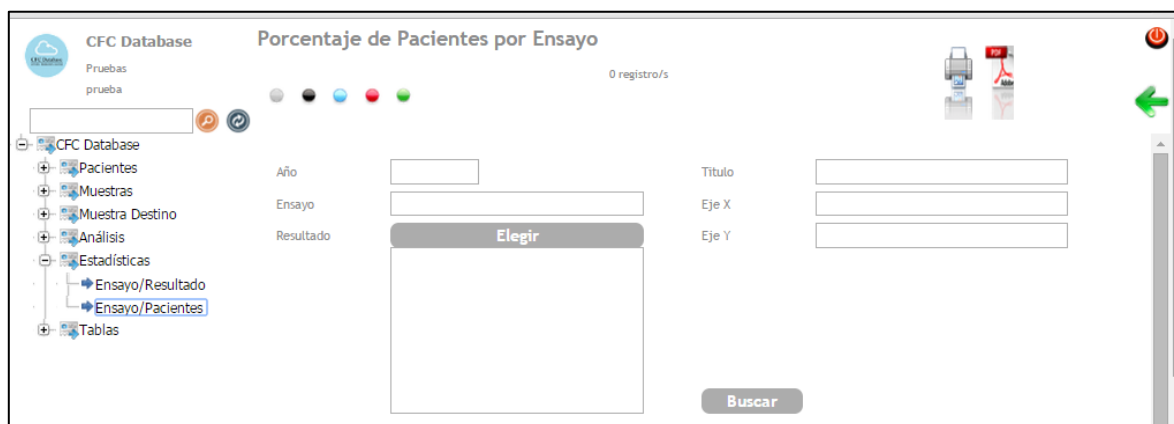

Complete todos los datos en la pantalla : Año, Ensayo, Resultado del Ensayo, Título del Gráfico y de los ejes X e Y.

Luego presione la palabra “Buscar” abajo a la derecha y obtendrá el gráfico solicitado en forma de barras.



**CFC Database**  
CYSTIC FIBROSIS CLOUD


**CFC Database**  
Pruebas  
prueba

## Porcentaje de Pacientes por Ensayo

0 registro/s







- CFC Database
- Pacientes
- Muestras
- Muestra Destino
- Análisis
- Estadísticas
  - Ensayo/Resultado
  - Ensayo/Pacientes
- Tablas

Año

Título

Ensayo

Eje X

Resultado

Elegir

Positivo  
Negativo

Eje Y

Buscar

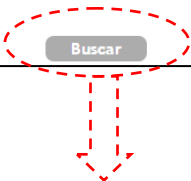

## Manual para el uso de *CFC database*

### 6. Tablas

Esta opción le permite agregar o modificar características de la base de datos con la cual usted trabaja para poder adaptarla a sus necesidades. Es decir, en aquellos casos en que se encuentre con campos que sólo permiten elegir entre ciertas opciones disponibles y no estuviera la opción deseada puede agregarla desde este comando.

Clickee sobre el signo + a la izquierda de “Tablas” para desplegar las opciones disponibles:

- Tipo Muestra
- Antibióticos
- Tipo Ensayo
- Ensayos
- Diagnósticos
- Tipos Infección
- Clínicas
- Arbol ensayos
- Hospitales
- Resultados
- Hospitales det
- Tipo Resultado
- Ciudades

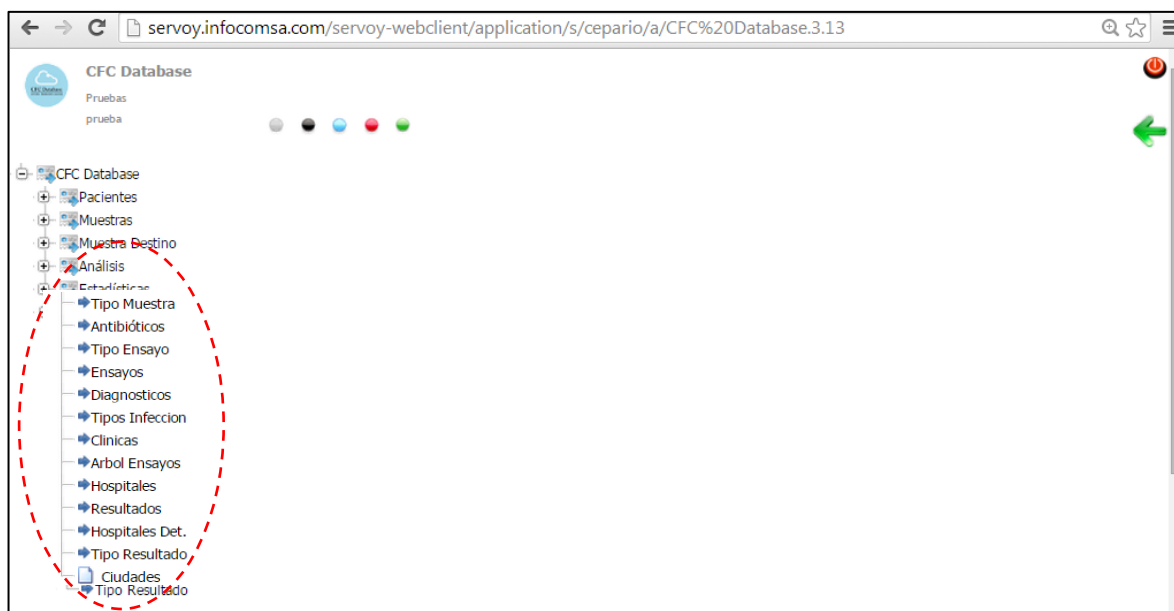

## Manual para el uso de *CFC database*

### 6.1. Agregar o modificar tipo de muestra:

Clickee sobre la opción “Tipo Muestra” y obtendrá la siguiente pantalla:

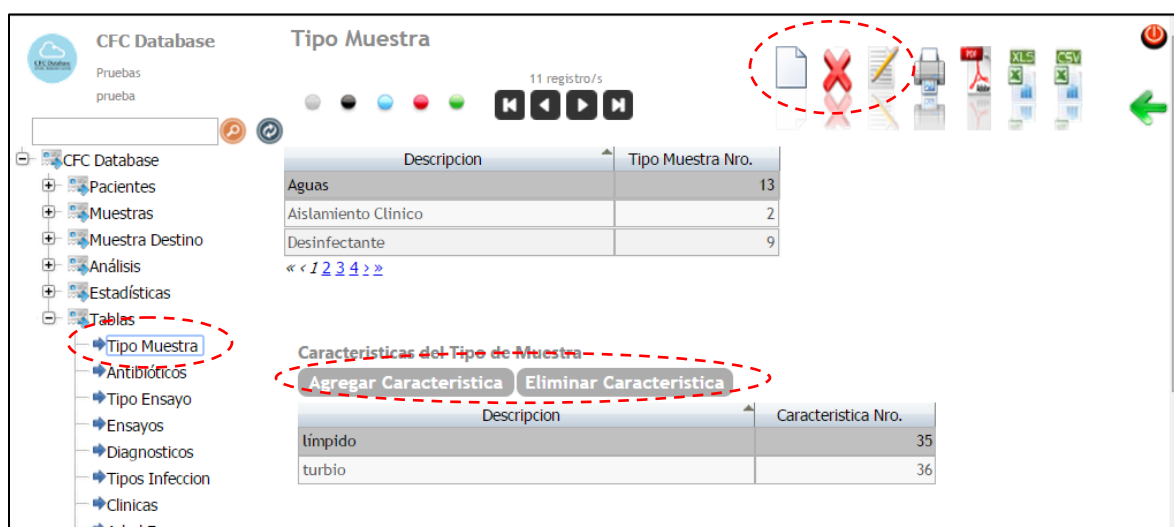

Para **agregar un tipo de muestra nuevo** seleccione la hoja en blanco arriba a la derecha de la pantalla. Para **modificar o eliminar uno ya existente** seleccione el papel con el lápiz o la X roja, respectivamente.

Complete el campo en blanco donde dice Descripción en caso de estar agregando un nuevo tipo de muestra y el sistema le otorgará automáticamente un número de tipo de muestra.

Seleccione una opción de la lista si quiere modificar o eliminar uno ya existente.

Agregue características del tipo de muestra seleccionando “Agregar característica” en la parte inferior de la pantalla. Elimine características de la misma seleccionando “Eliminar Característica”

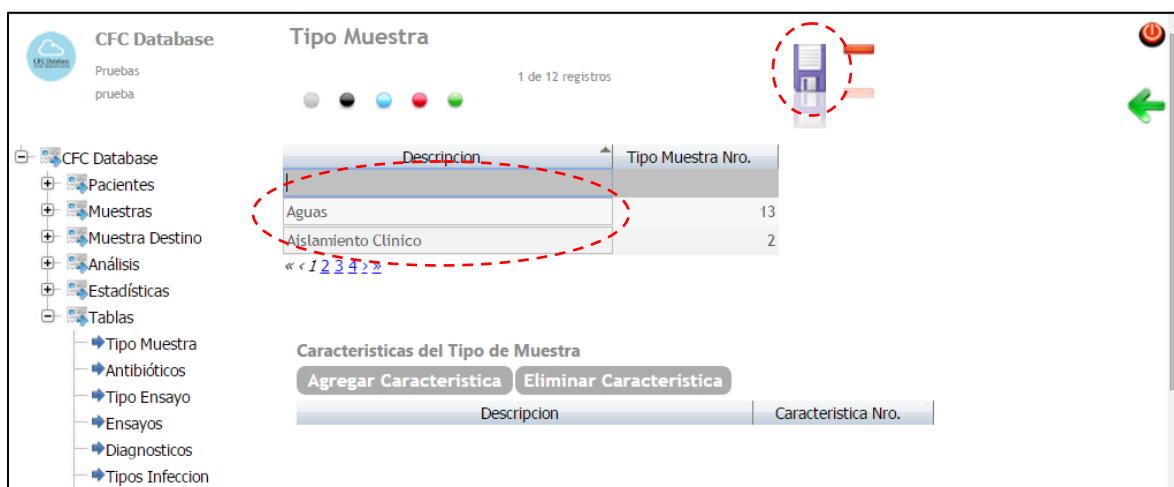

## Manual para el uso de *CFC database*

Una vez realizados los cambios seleccione el dibujo del diskette correspondiente al comando **Guardar** arriba a la derecha de la pantalla.

### 6.2. Agregar o modificar antibióticos:

Clickee sobre la opción “Antibióticos” y obtendrá la siguiente pantalla:

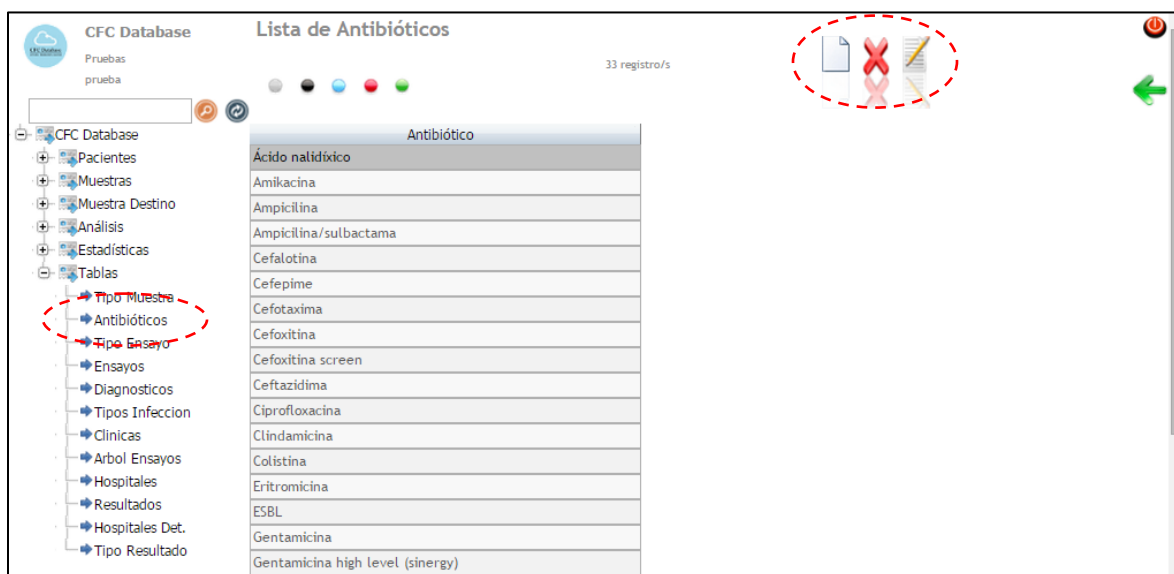

Para **agregar un antibiótico nuevo** seleccione la hoja en blanco arriba a la derecha de la pantalla. Para modificar o eliminar uno ya existente seleccione el papel con el lápiz o la X roja, respectivamente.

Complete el campo en blanco donde dice Antibiótico en caso de estar agregando uno nuevo o seleccione una opción de la lista si quiere modificar o eliminar uno ya existente.

Una vez realizados los cambios seleccione el dibujo del diskette correspondiente al comando **Guardar** arriba a la derecha de la pantalla.

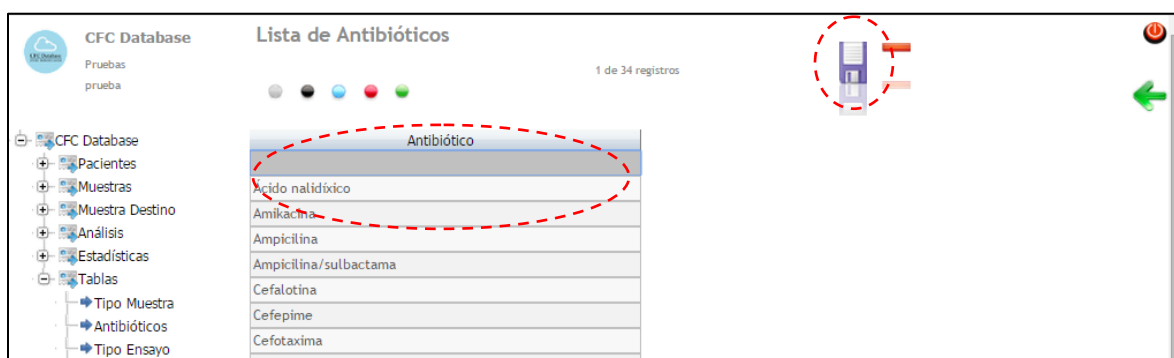

## Manual para el uso de *CFC database*

### 6.3. Agregar o modificar tipo de ensayo:

Clickee sobre la opción “Tipo Ensayo” y obtendrá la siguiente pantalla:

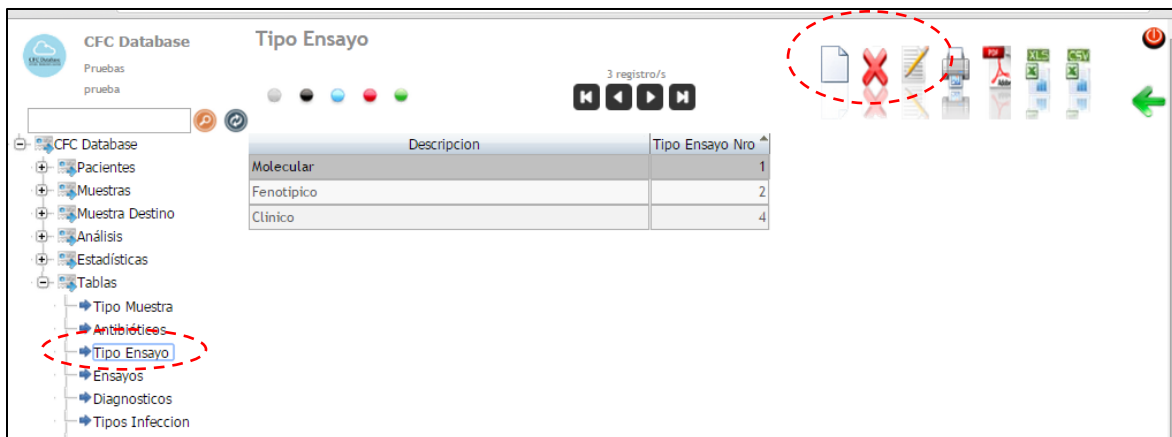

Para **agregar un tipo de ensayo nuevo** seleccione la hoja en blanco arriba a la derecha de la pantalla. Para **modificar o eliminar uno ya existente** seleccione el papel con el lápiz o la X roja, respectivamente.

Complete el campo en blanco donde dice Descripción en caso de estar agregando uno nuevo y el sistema le otorgará automáticamente un número de tipo de ensayo. Seleccione una opción de la lista si quiere modificar o eliminar uno ya existente.

Una vez realizados los cambios seleccione el dibujo del diskette correspondiente al comando **Guardar** arriba a la derecha de la pantalla.

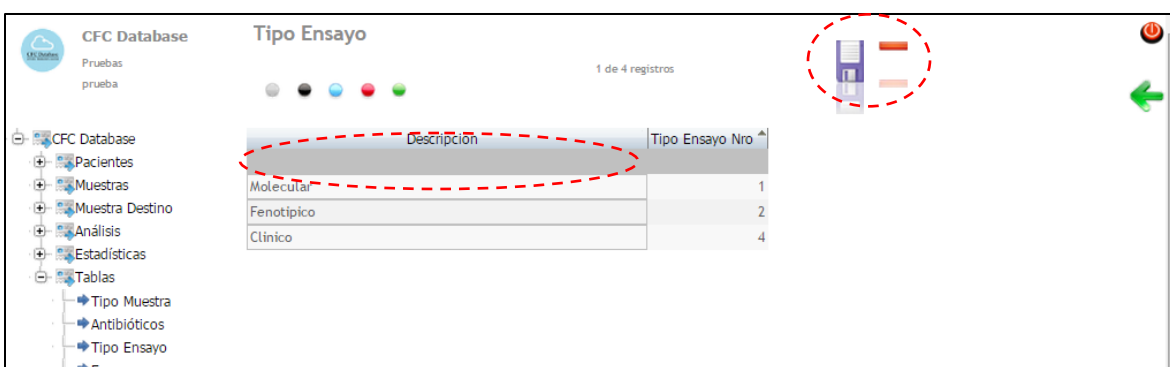

6.4. Agregar o modificar Ensayo:

Clickee sobre la opción “Ensayos” y obtendrá la siguiente pantalla:

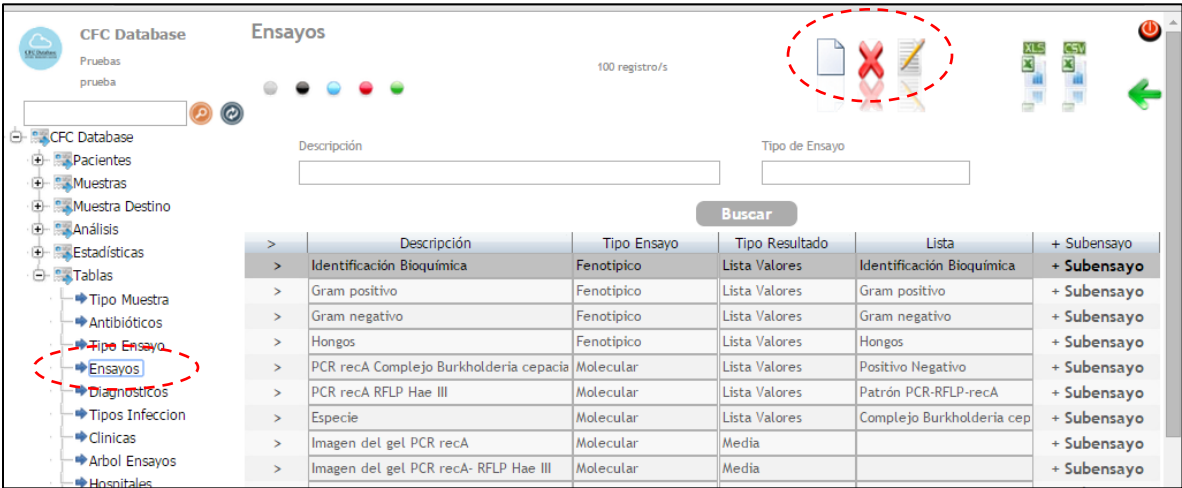

Para **agregar un ensayo nuevo** seleccione la hoja en blanco arriba a la derecha de la pantalla. Aparecerá la siguiente pantalla:

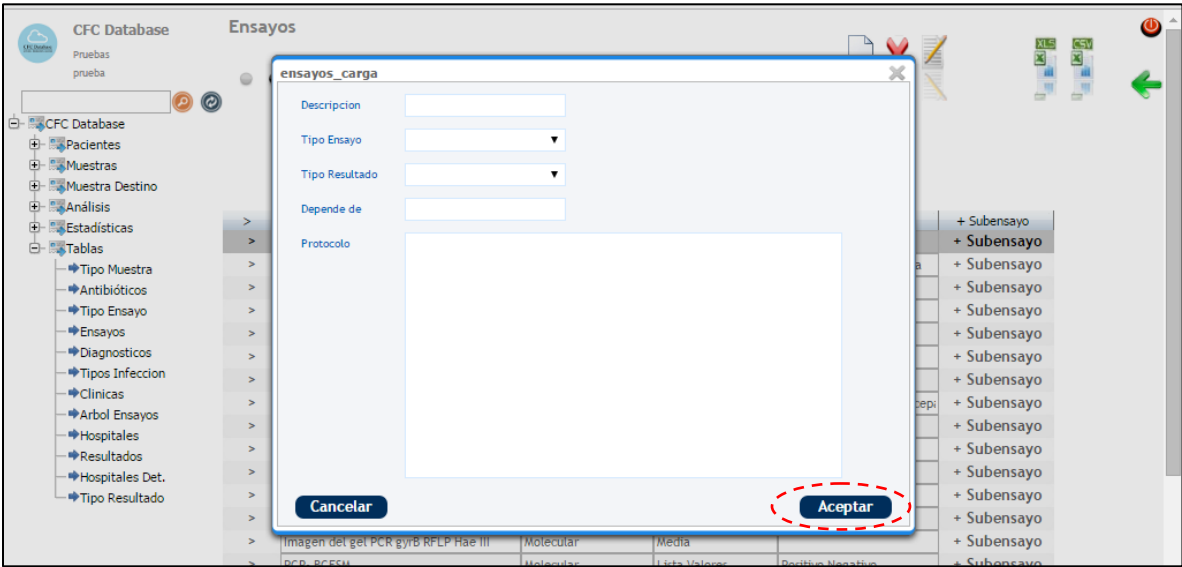

Complete el campo en blanco donde dice Descripción. Seleccione el Tipo de Ensayo (Clínico, Fenotípico, Molecular,etc.) y el tipo de Resultado entre las opciones disponibles (Entero, Numérico, Lista Valores, Texto o Media). Puede completar además el “Protocolo” del ensayo.Una vez completado presione la palabra “Aceptar” abajo a la derecha.

## Manual para el uso de *CFC database*

Para **modificar o eliminar un ensayo** puede utilizar el buscador o seleccionar una opción de la lista. Clickee en el signo > a la izquierda del ensayo que quiere modificar o eliminar.

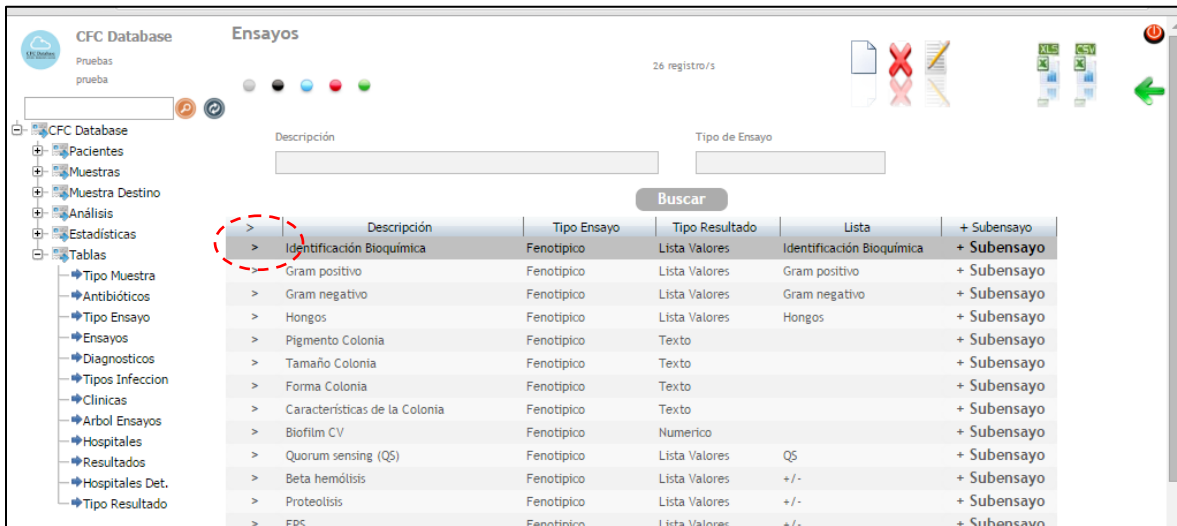

Aparecerá la siguiente pantalla :

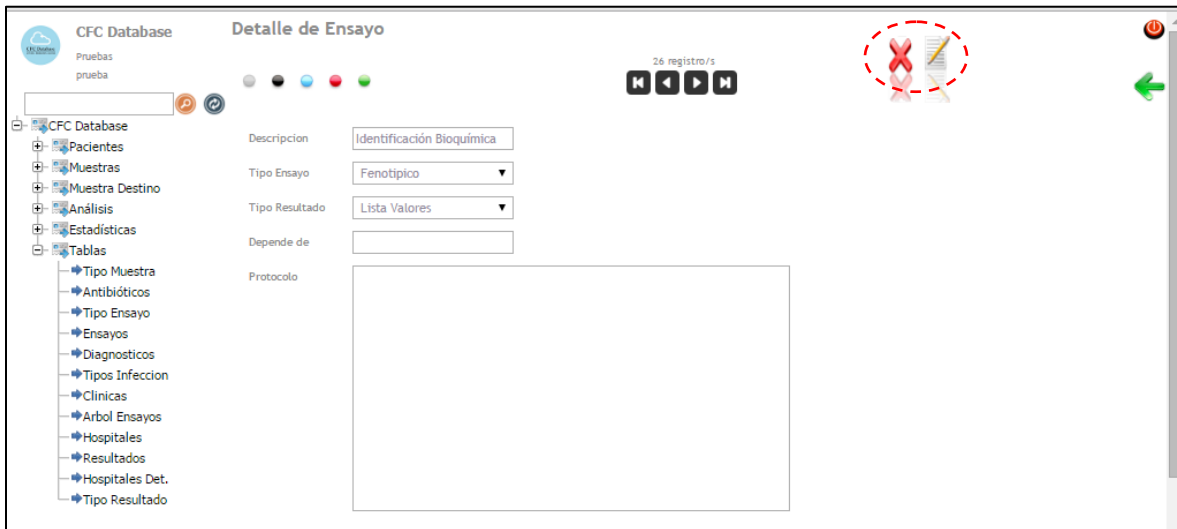

Seleccione el papel con el lápiz si quiere **Modificar** el ensayo o la X roja si quiere **Eliminar**. Una vez realizados los cambios seleccione el dibujo del diskette correspondiente al comando **Guardar** arriba a la derecha de la pantalla.

## Manual para el uso de *CFC database*

### 6.4.1. Agregar o modificar subensayo:

Clickee sobre la opción “Ensayos” y obtendrá la siguiente pantalla:

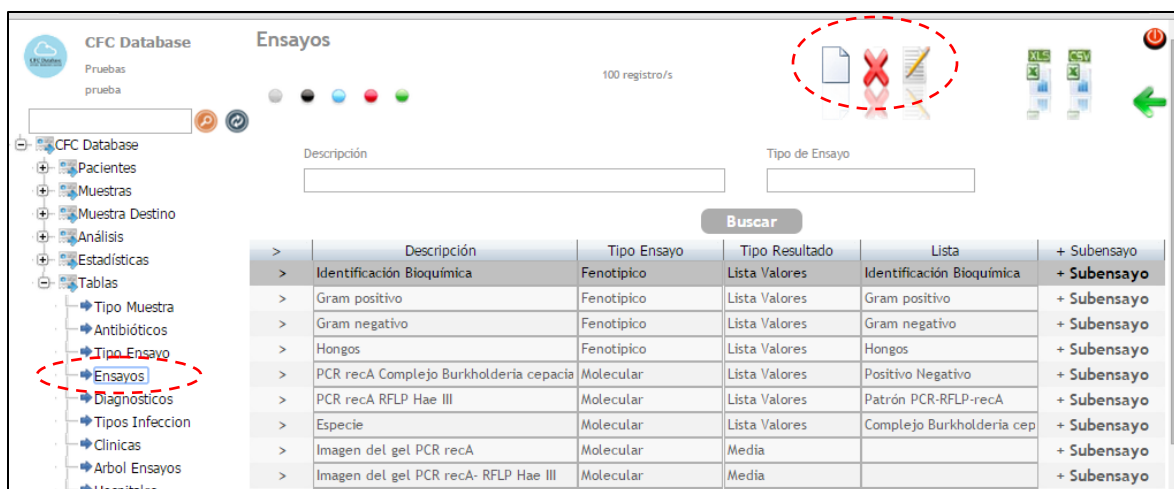

Para **agregar un subensayo nuevo** seleccione la palabra + Subensayo a la derecha del ensayo correspondiente. Previamente puede realizar una búsqueda según la descripción o el Tipo de Ensayo. Aparecerá la siguiente pantalla:

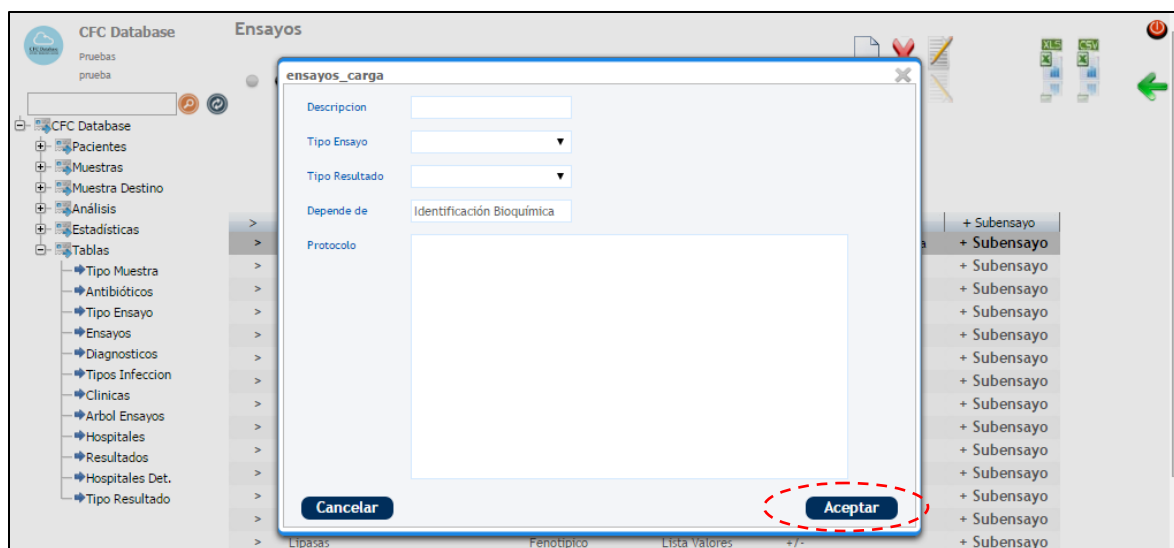

Complete el campo en blanco donde dice Descripción. Seleccione el Tipo de Ensayo (Clínico, Fenotípico, Molecular, etc.) y el tipo de Resultado entre las opciones disponibles (Entero, Numérico, Lista Valores, Texto o Media).

El campo “Depende de” se encontrará completo si usted indicó que se trata de un subensayo. Puede completar además el “Protocolo” del ensayo. Una vez completado presione la palabra “Aceptar” abajo a la derecha.



## Manual para el uso de *CFC database*

### 6.5. Agregar o modificar diagnósticos:

Clickee sobre la opción “Diagnósticos” y obtendrá la siguiente pantalla:

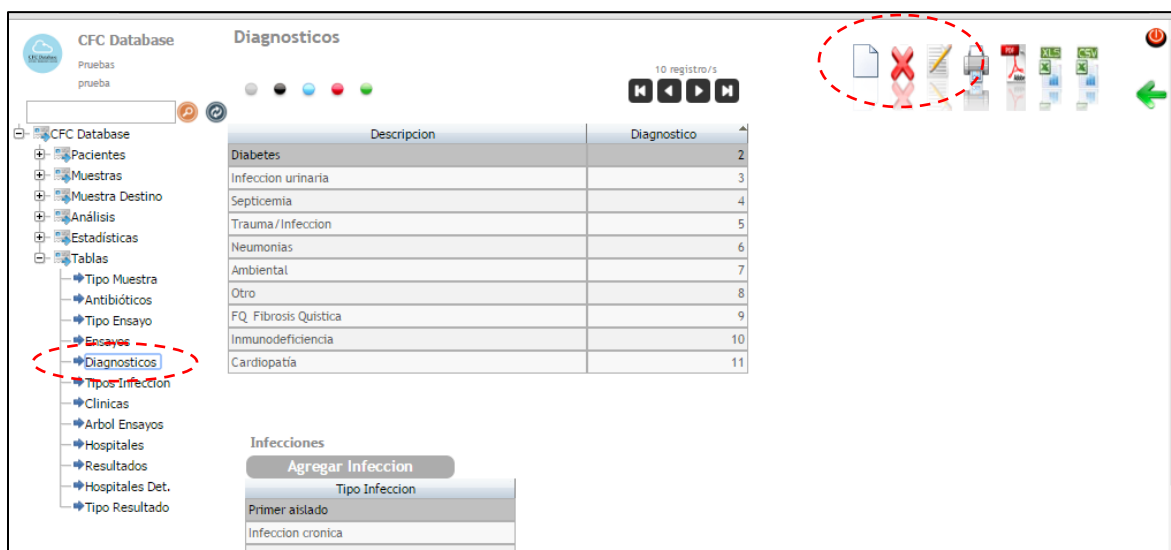

Para **agregar un diagnóstico nuevo** seleccione la hoja en blanco arriba a la derecha de la pantalla. Para **modificar o eliminar uno ya existente** seleccione el papel con el lápiz o la X roja, respectivamente.

Complete el campo en blanco donde dice Descripción en caso de estar agregando un nuevo diagnóstico y el sistema le otorgará automáticamente un número.

Seleccione una opción de la lista si quiere modificar o eliminar un diagnóstico ya existente.

Agregue tipo de infección relacionados con cada diagnóstico seleccionando “Agregar infección” en la parte inferior de la pantalla.

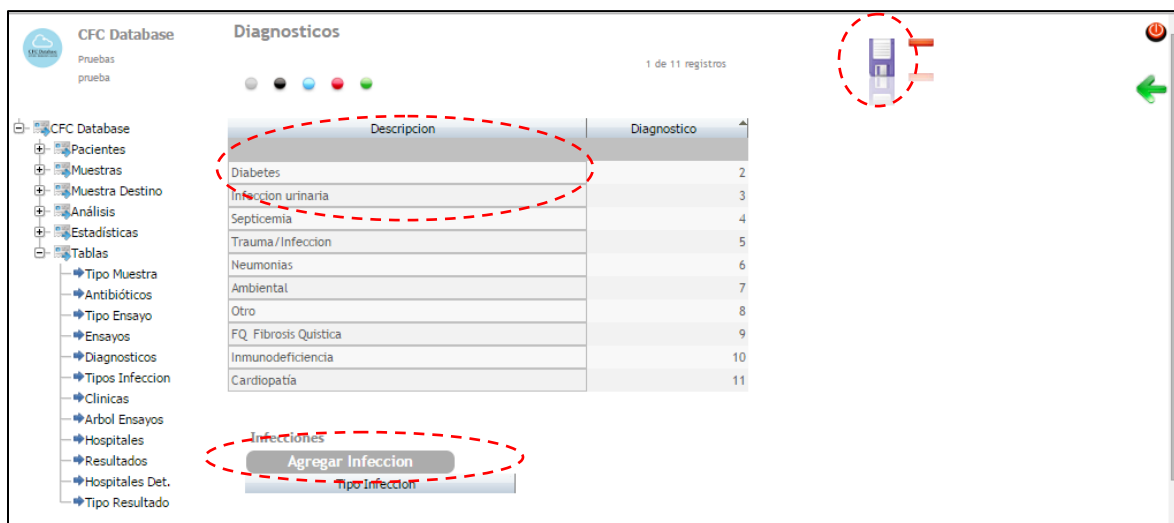

Una vez realizados los cambios seleccione el dibujo del diskette correspondiente al comando **Guardar** arriba a la derecha de la pantalla.

## Manual para el uso de *CFC database*

### 6.6. Agregar o modificar tipo de infección:

Clickee sobre la opción “Tipo Infección” y obtendrá la siguiente pantalla:

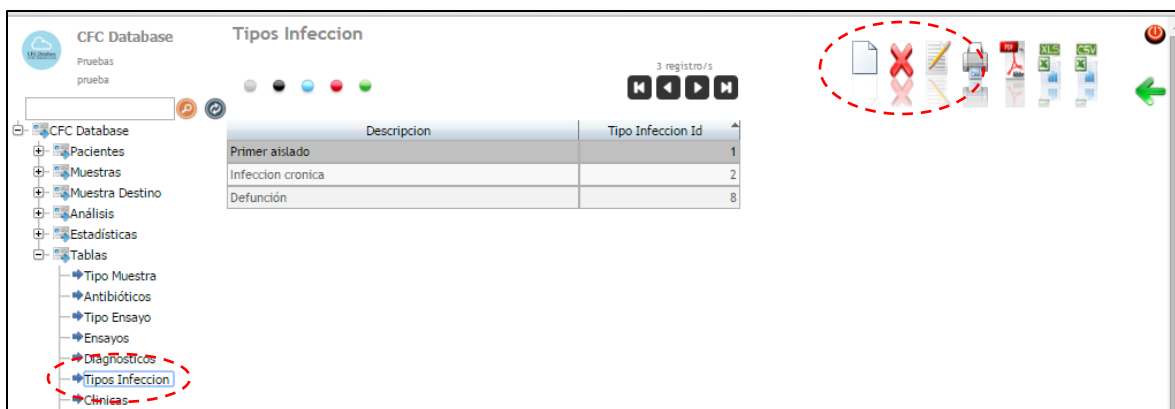

Para **agregar un tipo de infección nuevo** seleccione la hoja en blanco arriba a la derecha de la pantalla. Para **modificar o eliminar uno ya existente** seleccione el papel con el lápiz o la X roja, respectivamente.

Complete el campo en blanco donde dice Descripción en caso de estar agregando un nuevo tipo de infeccion y el sistema le otorgará automáticamente un número.

Seleccione una opción de la lista si quiere modificar o eliminar uno ya existente.

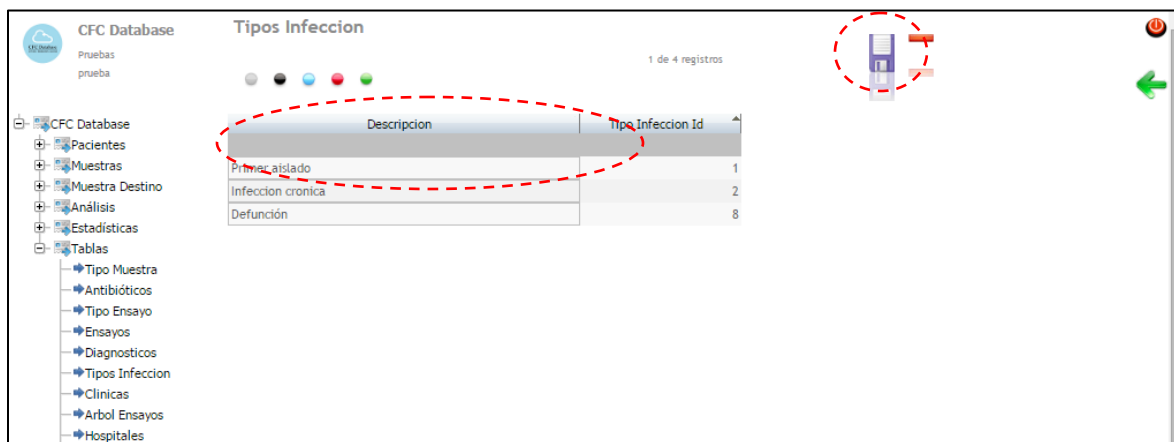

Una vez realizados los cambios seleccione el dibujo del diskette correspondiente al comando **Guardar** arriba a la derecha de la pantalla.

## Manual para el uso de *CFC database*

### 6.7. Agregar o modificar parámetros clínicos:

Clickee sobre la opción “Clínicas” y obtendrá la siguiente pantalla:

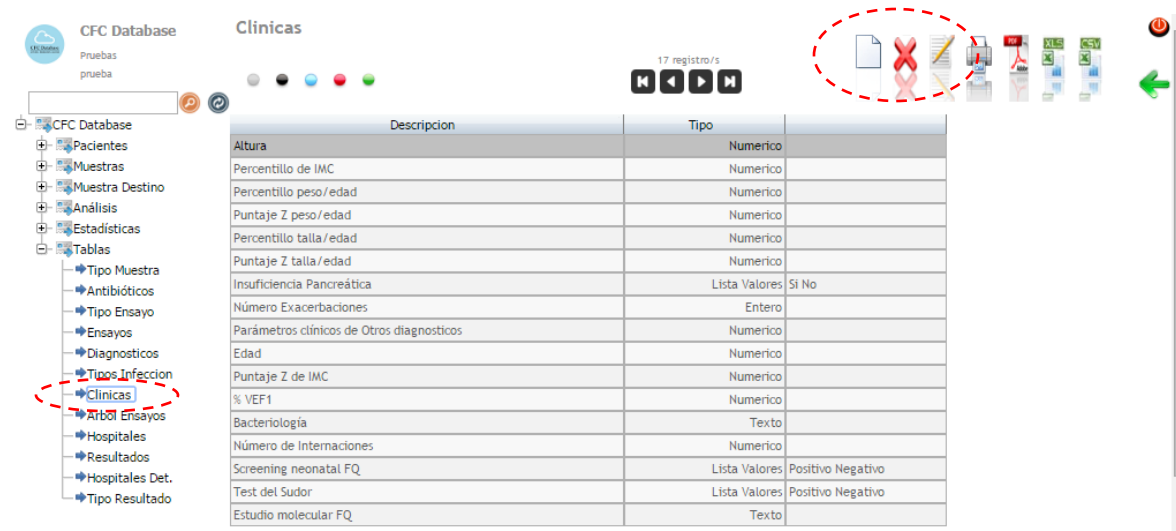

| Descripcion                               | Tipo          |                   |
|-------------------------------------------|---------------|-------------------|
| Altura                                    | Numerico      |                   |
| Percentillo de IMC                        | Numerico      |                   |
| Percentillo peso/edad                     | Numerico      |                   |
| Puntaje Z peso/edad                       | Numerico      |                   |
| Percentillo talla/edad                    | Numerico      |                   |
| Puntaje Z talla/edad                      | Numerico      |                   |
| Insuficiencia Pancreática                 | Lista Valores | Si No             |
| Número Exacerbaciones                     | Entero        |                   |
| Parámetros clínicos de Otros diagnosticos | Numerico      |                   |
| Edad                                      | Numerico      |                   |
| Puntaje Z de IMC                          | Numerico      |                   |
| % VEF1                                    | Numerico      |                   |
| Bacteriología                             | Texto         |                   |
| Número de Internaciones                   | Numerico      |                   |
| Screening neonatal FQ                     | Lista Valores | Positivo Negativo |
| Test del Sudor                            | Lista Valores | Positivo Negativo |
| Estudio molecular FQ                      | Texto         |                   |

Para **agregar un dato clínico nuevo** seleccione la hoja en blanco arriba a la derecha de la pantalla. Para **modificar o eliminar uno ya existente** seleccione el papel con el lápiz o la X roja, respectivamente.

Complete el campo en blanco donde dice Descripción en caso de estar agregando un nuevo dato clínico. Seleccione entre las opciones disponibles correspondientes a Tipo (Entero, Numérico, Lista Valores, Texto o Media) y los resultados posibles si correspondiese (última columna).

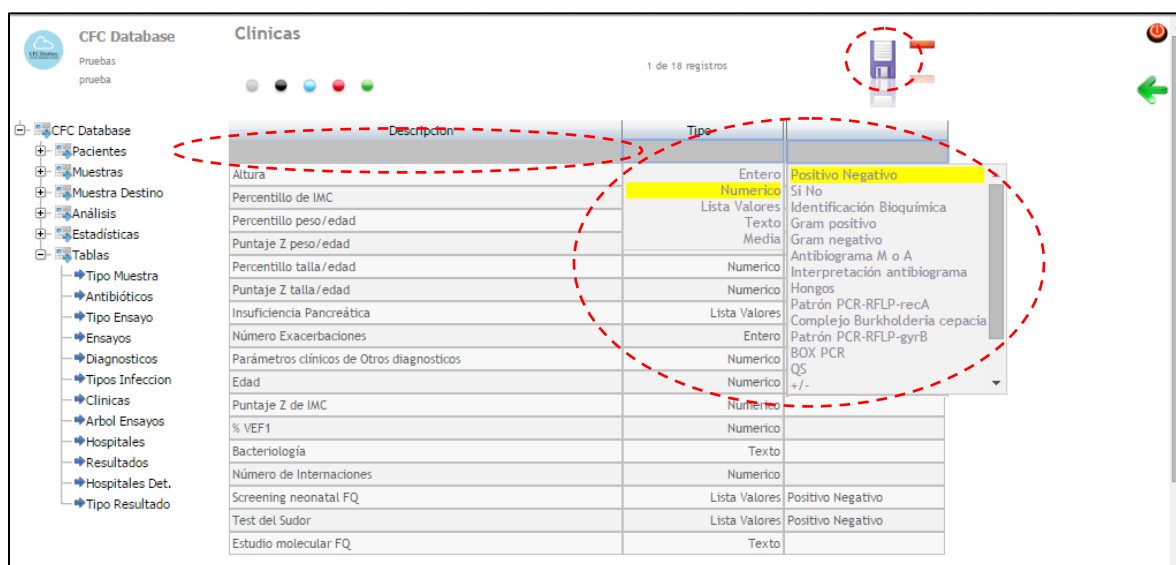

| Descripcion                               | Tipo          |                               |
|-------------------------------------------|---------------|-------------------------------|
| Altura                                    | Entero        | Positivo Negativo             |
| Percentillo de IMC                        | Numerico      | Si No                         |
| Percentillo peso/edad                     | Lista Valores | Identificación Bioquímica     |
| Puntaje Z peso/edad                       | Texto         | Gram positivo                 |
| Percentillo talla/edad                    | Media         | Gram negativo                 |
| Puntaje Z talla/edad                      | Numerico      | Antibiograma M o A            |
| Insuficiencia Pancreática                 | Numerico      | Interpretación antibiograma   |
| Número Exacerbaciones                     | Lista Valores | Hongos                        |
| Parámetros clínicos de Otros diagnosticos | Entero        | Patrón PCR-RFLP-recA          |
| Edad                                      | Numerico      | Complejo Burkholderia cepacia |
| Puntaje Z de IMC                          | Numerico      | Patrón PCR-RFLP-gyrB          |
| % VEF1                                    | Numerico      | BOX PCR                       |
| Bacteriología                             | Texto         | QS                            |
| Número de Internaciones                   | Numerico      | +/-                           |
| Screening neonatal FQ                     | Lista Valores | Positivo Negativo             |
| Test del Sudor                            | Lista Valores | Positivo Negativo             |
| Estudio molecular FQ                      | Texto         |                               |

Seleccione una opción de la lista si quiere modificar o eliminar un diagnóstico ya existente.

Una vez realizados los cambios seleccione el dibujo del diskette correspondiente al comando **Guardar** arriba a la derecha de la pantalla.

## Manual para el uso de *CFC database*

### 6.8. Agregar o modificar Hospitales:

Clickee sobre la opción “Hospitales” y obtendrá la siguiente pantalla:

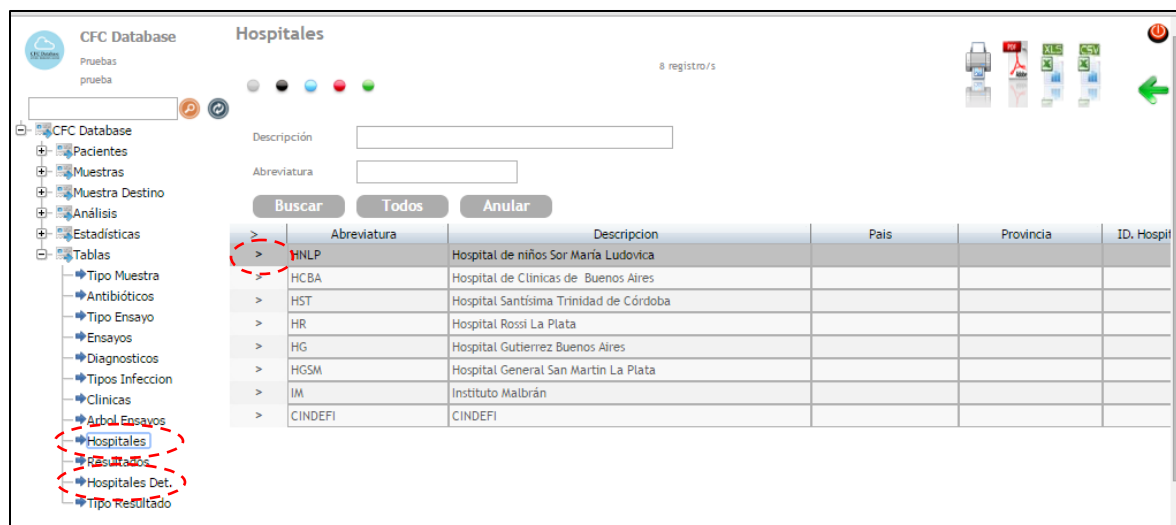

Para **agregar un nuevo hospital** seleccione el signo > a la izquierda de cualquiera de los hospitales existentes o clickee sobre la opción “Hospitales Det” en el menú principal de la izquierda. Luego clickee sobre la hoja en blanco arriba a la derecha de la pantalla.

Para **modificar o eliminar uno ya existente** seleccione el signo > a la izquierda del hospital que quiere modificar o eliminar y seleccione el papel con el lápiz o la X roja, respectivamente.

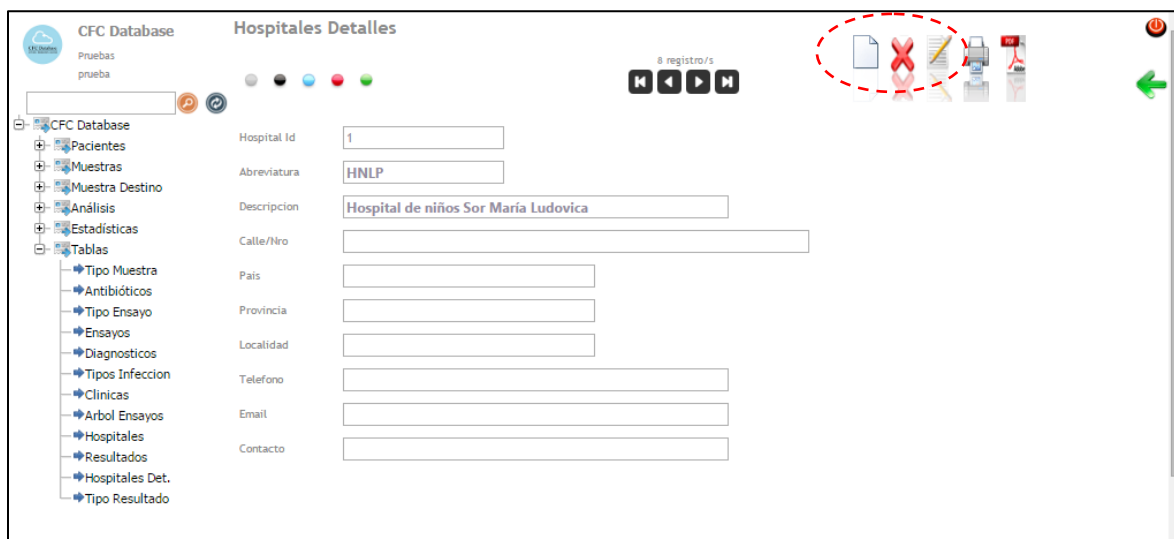

Complete los campos en blanco: Abreviatura, Descripción, Calle, Nro., País, Provincia, Localidad, Teléfono, Email y Contacto. El sistema le otorgará automáticamente un número.

Una vez realizados los cambios seleccione el dibujo del diskette correspondiente al comando **Guardar** arriba a la derecha de la pantalla.

## Manual para el uso de *CFC database*

### 6.9. Agregar o modificar posibles resultados:

Clickee sobre la opción “Resultados” y obtendrá la siguiente pantalla:

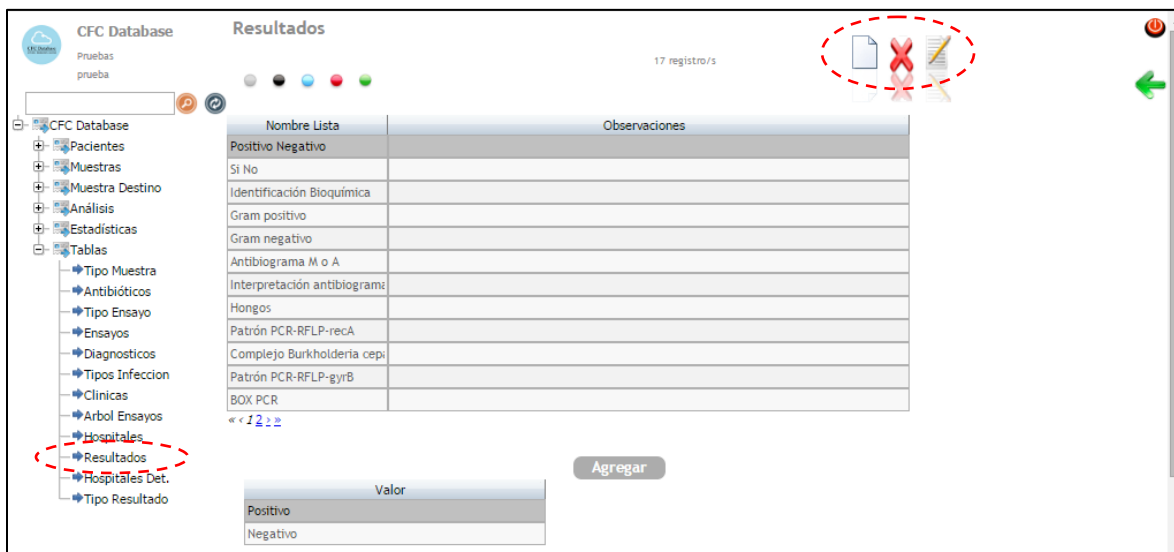

Para **agregar un resultado nuevo** seleccione la hoja en blanco arriba a la derecha de la pantalla.

Para **modificar o eliminar uno ya existente** seleccione el papel con el lápiz o la X roja, respectivamente.

Complete el campo en blanco donde dice Nombre Lista y las Observaciones si corresponde.

Seleccione una opción de la lista si quiere modificar o eliminar un diagnóstico ya existente.

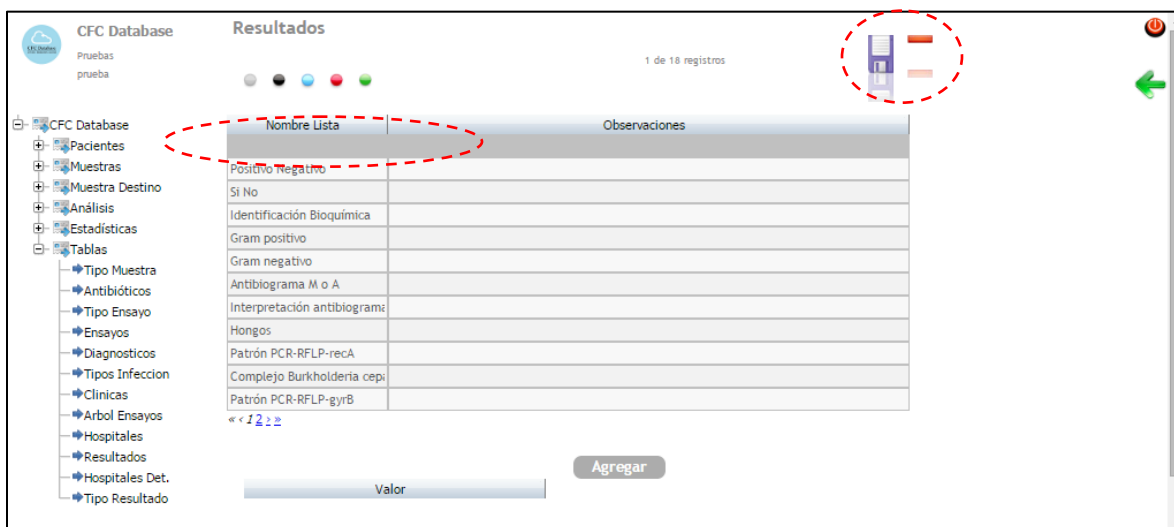

Una vez realizados los cambios seleccione el dibujo del diskette correspondiente al comando **Guardar** arriba a la derecha de la pantalla.

6.9.1. Agregar o modificar valores para los resultados:

Clickee sobre la opción “Resultados” y obtendrá la siguiente pantalla:

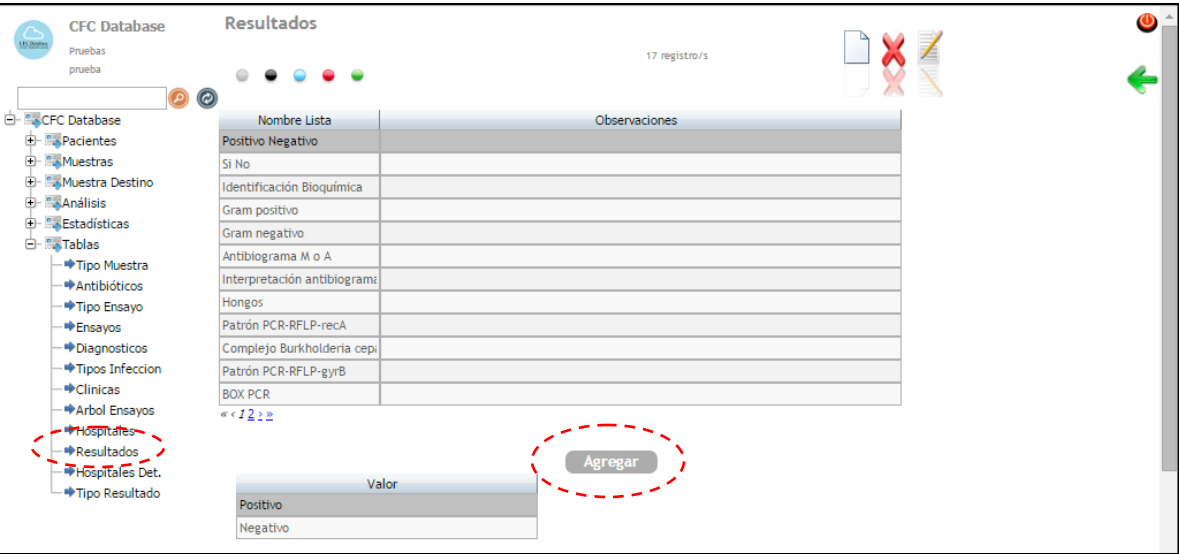

Seleccione una opción de la lista si quiere agregar valores relacionados a dicho resultado. Clickee “Agregar ” en la parte inferior de la pantalla.

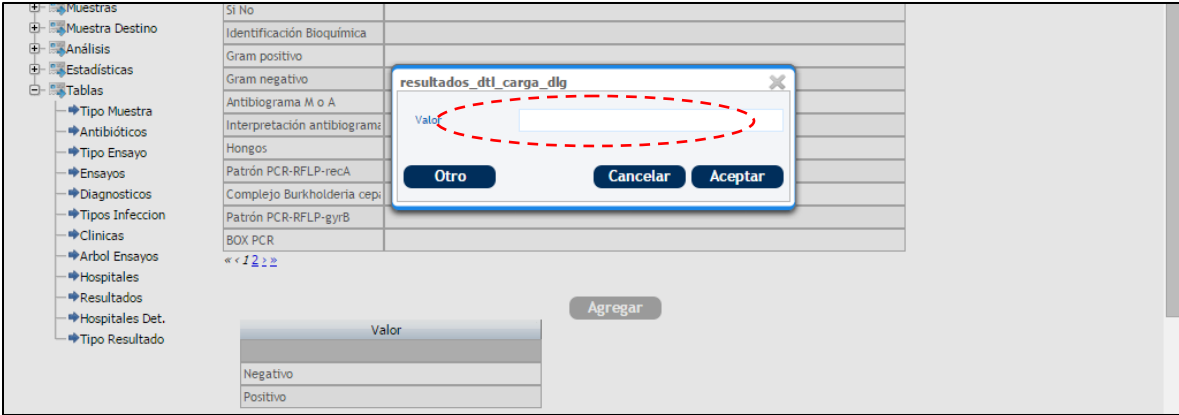

Complete con el valor que quiere agregar y clickee en la palabra “Aceptar”. Si quiere continuar agregando valores puede seleccionar la opción “Otro”.

## Manual para el uso de *CFC database*

### 6.10. Agregar o modificar tipo de resultado:

Clickee sobre la opción “Tipo Resultado” y obtendrá la siguiente pantalla:

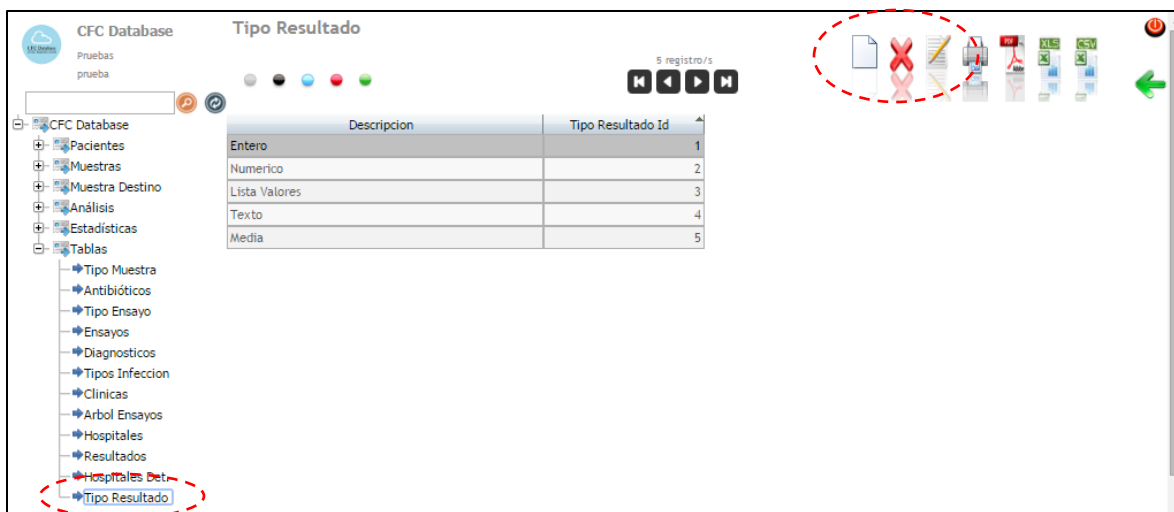

Para **agregar un tipo de resultado nuevo** seleccione la hoja en blanco arriba a la derecha de la pantalla. Para modificar o eliminar uno ya existente seleccione el papel con el lápiz o la X roja, respectivamente.

Complete el campo en blanco donde dice Descripción en caso de estar agregando un nuevo tipo de resultado y el sistema le otorgará automáticamente un número.

Seleccione una opción de la lista si quiere modificar o eliminar uno ya existente.

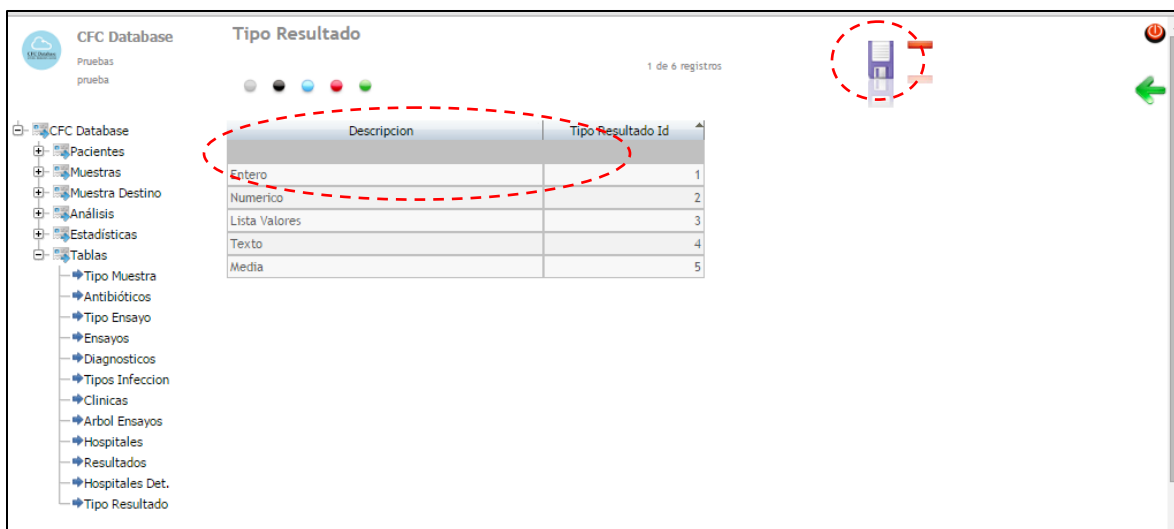

Una vez realizados los cambios seleccione el dibujo del diskette correspondiente al comando **Guardar** arriba a la derecha de la pantalla.

6.11. Agregar ciudades:

Clickee sobre la opción “Ciudades” y obtendrá la siguiente pantalla:

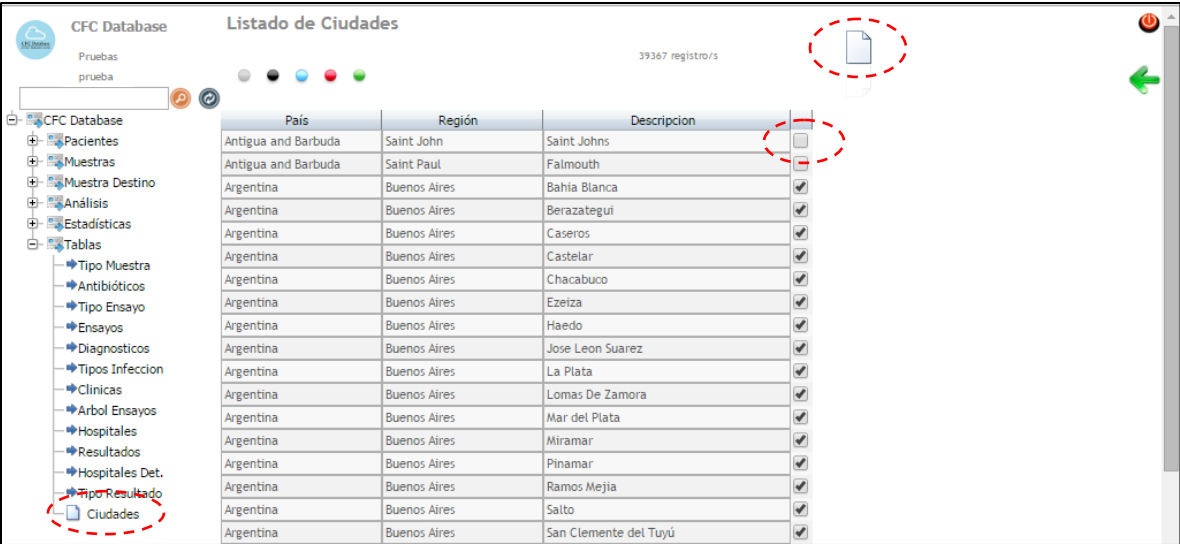

Para seleccionar una ciudad y volverla “activa” (convertirla en una opción disponible), clickee sobre el último casillero a la derecha de la misma. Las ciudades activas aparecerán marcadas con un tilde azul ☒

Para **agregar una nueva ciudad** seleccione la hoja en blanco arriba a la derecha de la pantalla.

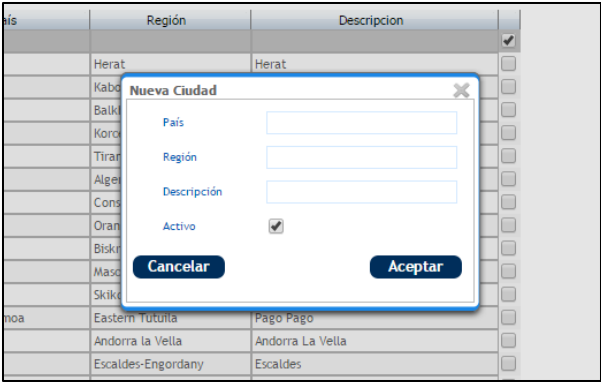

Complete los campos en blanco: donde dice Descripción agregue la nueva ciudad y elija entre las opciones el país y la región donde pertenece. Luego seleccione la palabra “Aceptar”.
